1  
2  
3  
4  
5  
6  
7  
8  
9  
10  
11  
12  
13  
14  
15  
16  
17  
18  
19  
20  
21  
22  
23  
24  
25  
26

## The NUCKS1-SKP2-p21/p27 axis controls S phase entry

Samuel Hume<sup>1</sup>, Claudia P. Grou<sup>1</sup>, Pauline Lascaux<sup>1</sup>, Vincenzo D'Angiolella<sup>1</sup>, Arnaud J. Legrand<sup>1, ‡, \*</sup>, Kristijan Ramadan<sup>1, \*</sup>, Grigory L. Dianov<sup>1, 2, 3, \*</sup>

<sup>1</sup>Medical Research Council Oxford Institute for Radiation Oncology, Department of Oncology, University of Oxford, OX3 7DQ, Oxford, UK <sup>2</sup>Institute of Cytology and Genetics, Siberian Branch of the Russian Academy of Sciences, Lavrentieva 10, 630090 Novosibirsk, Russia <sup>3</sup>Novosibirsk State University, Novosibirsk, Russian Federation, 630090

‡: Present address: Breast Cancer Now Toby Robins Research Centre, The Institute of Cancer Research, London, SW3 6JB, UK

\*: Co-corresponding authors.

Contacts:

Grigory.dianov@oncology.ox.ac.uk  
Kristijan.ramadan@oncology.ox.ac.uk  
Arnaud.legrand@icr.ac.uk

27 **Abstract**

28 Efficient entry into S phase of the cell cycle is necessary for embryonic development  
29 and tissue homeostasis. However, unscheduled S phase entry triggers DNA damage  
30 and promotes oncogenesis, underlining the requirement for strict control. Here, we  
31 identify the NUCKS1-SKP2-p21/p27 axis as a checkpoint pathway for the G1/S  
32 transition. In response to mitogenic stimulation, NUCKS1, a transcription factor, is  
33 recruited to chromatin to activate expression of *SKP2*, the F-box component of the  
34 SCF<sup>SKP2</sup> ubiquitin ligase, leading to degradation of p21 and p27 and promoting  
35 progression into S phase. In contrast, DNA damage induces p53-dependent  
36 transcriptional repression of *NUCKS1*, leading to SKP2 downregulation, p21/p27  
37 upregulation, and cell cycle arrest. We propose that the NUCKS1-SKP2-p21/p27 axis  
38 integrates mitogenic and DNA damage signalling to control S phase entry. TCGA data  
39 reveal that this mechanism is hijacked in many cancers, potentially allowing cancer  
40 cells to sustain uncontrolled proliferation.

41

42

43

44

45

46

47

48

49

50

51

52

## 53 **Introduction**

54 Entry into S phase of the cell cycle is essential to sustain the proliferation that permits  
55 embryonic development and tissue repair<sup>1</sup>, but unscheduled S phase entry induces  
56 replication stress, DNA damage, and oncogenesis<sup>2-5</sup>. G1/S progression must  
57 therefore be strictly controlled<sup>6-8</sup>. S phase entry is driven by mitogens, which increase  
58 the ratio of G1/S cyclins: cyclin-dependent kinase (CDK) inhibitors and activate G1/S  
59 CDKs as a result. In contrast, DNA damage inhibits S phase entry, stimulating p53  
60 signalling to reduce the G1/S cyclin: CDK inhibitor ratio and prevent G1/S CDK  
61 activity<sup>9</sup>. Only cells whose mitogenic signalling outcompetes their DNA damage load  
62 are permitted to enter S phase<sup>6,10-14</sup>, which must be achieved through the integration  
63 of these antagonistic stimuli by signalling hubs. However, signalling hubs that achieve  
64 this goal are not well-characterised<sup>6</sup>.

65 The transcription factor Nuclear Ubiquitous Casein kinase and cyclin-dependent  
66 Kinase Substrate 1 (NUCKS1) has emerged in the light of recent studies as a  
67 promising candidate for one such signalling hub. NUCKS1, a member of the high  
68 mobility group family of proteins<sup>15</sup>, increases chromatin accessibility at target  
69 promoters to enable the recruitment of RNA polymerase II<sup>16</sup>. So far, the only direct  
70 transcriptional targets identified for NUCKS1 regulate insulin receptor signalling<sup>16</sup>.  
71 However, NUCKS1 is known to affect cell cycle progression and proliferation in  
72 mammary epithelial cells<sup>17</sup> and gastric cancer cells<sup>18</sup>, and also plays a role in the  
73 protection of replication fidelity by regulating double-strand break (DSB) repair<sup>19-22</sup>. In  
74 addition, NUCKS1 is a phosphorylation substrate for CDK2 and CDK1, the major  
75 kinases controlling the G1/S and G2/M transitions<sup>23-28</sup>, and for the DNA damage  
76 response (DDR) kinases ATM and DNA-PK<sup>29,30</sup>. Furthermore, Rb-E2F<sup>31</sup> and p53<sup>32</sup>  
77 have been detected in the proximity of the *NUCKS1* promoter by genome wide ChIP-

78 Seq, suggesting that *NUCKS1* expression might be regulated by the cell cycle or by  
79 DNA damage.

80 *NUCKS1* also exhibits oncogenic properties, and its overexpression, correlating with  
81 poor patient prognosis, has been reported in a number of cancers<sup>33–38</sup>. Furthermore,  
82 *NUCKS1* depletion inhibits - while its overexpression promotes - xenograft tumour  
83 growth<sup>18,39,40</sup>, suggesting a direct role in tumourigenesis.

84 Altogether, these studies suggest a potentially important role for *NUCKS1* in cell cycle  
85 progression. However, mechanistic details explaining how *NUCKS1* does this are  
86 unknown. In particular, whether *NUCKS1* employs transcriptional control of the cell  
87 cycle – and which putative targets of *NUCKS1* are involved – has not been  
88 established. The precise cell cycle phase affected by *NUCKS1* is also not known, and  
89 how *NUCKS1* is regulated throughout the cell cycle, by mitogens, or following DNA  
90 damage, has not been explored.

91 Here, we show that S phase Kinase-associated Protein 2 (*SKP2*) is a transcriptional  
92 target for *NUCKS1* in late G1 phase, and identify the SKP2-p21/p27 axis as a pathway  
93 controlled by *NUCKS1*. *SKP2* is a substrate-recruiting F-box protein, which forms,  
94 along with *SKP1*, *CUL1*, and *RBX1*, the SCF<sup>SKP2</sup> ubiquitin ligase complex<sup>41</sup>. During  
95 the G1/S transition, *SKP2* directs SCF<sup>SKP2</sup> for degradation of the CDK inhibitors p21  
96 and p27, relieving p21/p27-mediated inhibition of cyclin E-CDK2<sup>12,14,42,43</sup>. In this way,  
97 SCF<sup>SKP2</sup> controls cell cycle and cancer progression<sup>44–46</sup>.

98 We find that the SKP2-p21/p27 axis acts through *NUCKS1* to integrate mitogenic and  
99 DNA damage signalling at the G1/S transition. We show that *NUCKS1* is stimulated  
100 by mitogens to promote *SKP2* expression and consequent p21/p27 degradation,  
101 enabling S phase entry. In contrast, DNA damage inhibits *NUCKS1* through p53,

102 reducing SKP2 levels, increasing p21/p27 levels, and blocking S phase entry. In this  
103 way, the NUCKS1-SKP2-p21/p27 axis acts as a checkpoint pathway for the G1/S  
104 transition, only permitting S phase entry for cells whose mitogenic signalling  
105 outcompetes their load of DNA damage.

## 106 **Results**

### 107 **NUCKS1 transcriptionally controls the SKP2-p21/p27 axis**

108 To investigate whether NUCKS1 regulates the transcription of genes involved in cell  
109 cycle progression, we cross-compared a list of genes whose expression correlates  
110 with *NUCKS1* mRNA in tumour samples and cell lines<sup>47</sup>, with genes whose promoter  
111 NUCKS1 binds in genome-wide ChIP-Seq<sup>16</sup>. This generated a list of 232 putative  
112 NUCKS1 target genes. Among them, we found several genes regulating the G1/S  
113 transition (e.g., *SKP2*, *CCND1*, *CDK6*, *E2F3*), DNA replication (e.g., *PCNA*), and the  
114 p53 pathway (e.g., *MDM2*). Gene Ontology (GO) biological processes enrichment  
115 analysis for the top hits, showing the best correlation with *NUCKS1*, reveals significant  
116 enrichment for genes associated with cell cycle progression (Supplementary Fig. 1A).

117 In a panel of the putative cell cycle targets, *SKP2* displays the strongest and most  
118 reproducible downregulation upon NUCKS1 depletion (Supplementary Fig. 1B), and,  
119 given its role in cell cycle progression, DNA replication, and the DDR<sup>44,46,48,49</sup>, we  
120 focused on *SKP2*. To gain a more comprehensive understanding of *NUCKS1*'s  
121 correlation with *SKP2*, we interrogated samples from The Cancer Genome Atlas  
122 (TCGA) database. Across a range of cancer types, mRNAs encoding *NUCKS1* and  
123 *SKP2* display a significant positive correlation (Fig. 1A). There is no such correlation  
124 between *NUCKS1* and the housekeeping genes used as negative controls, *B2M* and  
125 *GAPDH* (Supplementary Fig. 1C). In particular, the correlation between *NUCKS1* and

126 *SKP2* is most striking in glioblastoma, kidney renal papillary cell carcinoma, skin  
127 cutaneous melanoma, and uveal melanoma (Supplementary Fig. 1D).

128 To confirm binding of NUCKS1 at the *SKP2* promoter<sup>16</sup>, and to map the binding site,  
129 we designed ChIP-qPCR assays employing a panel of 10 primer sets spanning  
130 sequential regions of the *SKP2* promoter (Fig. 1B). In these assays, we found that  
131 NUCKS1 displays specificity for the chromatin directly upstream of the *SKP2*  
132 transcription start site (TSS), consistent with its role as a transcription factor (Fig. 1C).

133 Next, we tested the effect of NUCKS1 loss by siRNA-mediated depletion or  
134 CRISPR/Cas9-mediated deletion on *SKP2* mRNA levels (Fig. 1D, Supplementary Fig.  
135 1E). We found that loss of NUCKS1 reduces *SKP2* gene expression across a cell line  
136 panel comprising three non-cancer cell lines (hTERT-immortalised bronchial epithelial  
137 cells: NBE1-hTERT; normal primary embryonic fibroblasts: TIG-1; hTERT-  
138 immortalised retinal epithelial cells: RPE1-hTERT), and six cancer cell lines (five  
139 colorectal cancer cell lines: HCT116, RKO, HT29, DLD1, CACO2; and osteosarcoma  
140 cells: U2OS) (Fig. 1D, Supplementary Fig. 1E). Loss of *SKP2* occurs independently of  
141 the p53 pathway, the Rb pathway, the mitogen-activated protein kinase (MAPK)  
142 pathway, and microsatellite instability (MSI) status (Fig. 1D). Furthermore, NUCKS1  
143 depletion reduces *SKP2* protein levels and increases levels of *SKP2*'s degradation  
144 targets, p21 and p27, confirming loss of *SKP2* activity (Fig. 1E), and this is  
145 independent of p53 (Supplementary Fig. 1F, G). Consistent with the reduction in *SKP2*  
146 levels, loss of NUCKS1 increases the stability of both p21 and p27, measured using  
147 cycloheximide chase assays (Supplementary Fig. 1H).

148 *SKP2* mRNA levels are low in early G1 and increase during the G1/S transition<sup>50</sup>. To  
149 test G1 cell cycle enrichment in NUCKS1-depleted cells (demonstrated in Figure 3) as

150 an indirect mechanism for *SKP2* downregulation, we measured *SKP2* levels in cells  
151 synchronised to G0/G1 before NUCKS1 depletion (Supplementary Fig. 1I). Under  
152 these conditions, loss of NUCKS1 still reduces *SKP2* mRNA levels (Supplementary  
153 Fig. 1J), comparable with NUCKS1 depletion from asynchronous cells. These results  
154 indicate that indirect cell cycle changes do not account for reduced levels of *SKP2* in  
155 NUCKS1-depleted cells.

156 Altogether, these data identify *SKP2* as a transcriptional target of NUCKS1 and show  
157 that NUCKS1 regulates *SKP2* expression independently of genetic background, and  
158 in multiple cellular contexts.

### 159 **NUCKS1 levels and chromatin-binding are induced in late G1 to promote *SKP2*** 160 **expression and G1/S progression**

161 To determine whether NUCKS1 itself is subject to cell cycle-dependent regulation, and  
162 to determine the point in the cell cycle during which NUCKS1 regulates *SKP2*, we  
163 measured protein levels of NUCKS1 and *SKP2* over the course of the cell cycle after  
164 release from G0/G1 synchronisation by contact inhibition. Using cyclin A2 as a marker  
165 for the onset of S phase<sup>51</sup>, we found that levels of NUCKS1 are low at the start of G1,  
166 increasing as cells progress into S phase (Fig. 2A). The upregulation of *SKP2* (but not  
167 NUCKS1) is driven partially<sup>52</sup> by an increase in its mRNA levels, which is NUCKS1-  
168 dependent (Fig. 2B). Furthermore, we detected recruitment of NUCKS1 to chromatin  
169 following release from contact inhibition-mediated G0/G1 arrest, using PCNA and  
170 MLH1 - both of which are recruited to chromatin once S phase has started<sup>53,54</sup> - as  
171 controls (Supplementary Fig. 2A). The major positive stimulus for S phase entry is  
172 provided by mitogens, which activate growth factor signalling<sup>55</sup>. We found that  
173 stimulation of cells with mitogens following 48 h of their withdrawal triggers the

174 recruitment of NUCKS1 to chromatin, demonstrating a potential activation of NUCKS1  
175 by mitogenic signalling (Fig. 2C).

176 Stimulation of NUCKS1 during G1 progression and by mitogens suggests an active  
177 role for NUCKS1 in S phase entry. To test this, we released control, NUCKS1-, or  
178 SKP2-depleted cells from G0/G1, and measured their ability to enter S phase. We  
179 found that siRNA-mediated NUCKS1 depletion substantially delays S phase entry  
180 following G0/G1 release, phenocopying SKP2 loss (Fig. 2D, E; Supplementary Fig.  
181 2B). Similarly, deletion of *NUCKS1* from U2OS cells impairs S phase entry  
182 (Supplementary Fig. 2C).

183 Together, these results demonstrate that NUCKS1's recruitment to chromatin is  
184 stimulated by mitogens and increases during G1 progression. At the chromatin,  
185 NUCKS1 is required to induce *SKP2* transcription and S phase entry.

### 186 **NUCKS1 controls S phase entry through the SKP2-p21/p27 axis**

187 Next, we investigated the phenotypic impact of control of the SKP2-p21/p27 axis by  
188 NUCKS1. We found that CRISPR/Cas9-mediated deletion of *NUCKS1* enriches cells  
189 in G0/G1 phase of the cell cycle, with a concomitant reduction in replicating cells (Fig.  
190 3A). This phenotype is reversed through overexpression of wildtype NUCKS1, but not  
191 by a DNA-binding defective mutant of NUCKS1 (in which the GRP motif is mutated to  
192 AAA), confirming that NUCKS1's DNA-binding activity is important for its role in cell  
193 cycle progression (Fig. 3B, Supplementary Fig. 3A). Furthermore, overexpression of  
194 NUCKS1 rescues cell cycle progression in NUCKS1-depleted HCT116 cells  
195 (Supplementary Fig. 3B, C), and NUCKS1 depletion delays cell cycle progression in  
196 TIG-1, NBE1-hTERT, and RPE1-hTERT cells (Supplementary Fig. 3D-F).



197 As a consequence, *NUCKS1* deletion from U2OS cells (Fig. 3C), and *NUCKS1*  
198 depletion from TIG-1 or NBE1-hTERT cells (Supplementary Fig. 3G, H), considerably  
199 reduce cellular proliferation. *NUCKS1* depletion does not cause DNA damage,  
200 measured by alkaline comet assay (which detects single-strand breaks (SSBs) and  
201 DSBs) (Supplementary Fig. 3I) or  $\gamma$ H2AX/53BP1 immunofluorescence  
202 (Supplementary Fig. 3J), demonstrating that these phenotypes are not explained by  
203 DNA damage-induced quiescence.

204 We then tested whether the accumulation of p21/p27 in *NUCKS1*-depleted cells is due  
205 to the loss of *SKP2*. We found that overexpression of *SKP2* in *NUCKS1*-depleted  
206 HCT116 (Fig. 3D) and A549 cells (Supplementary Fig. 3K) mostly induces degradation  
207 of the p21/p27 that accumulate in these cells. Consequently, overexpression of *SKP2*  
208 in *NUCKS1*-depleted HCT116 (Fig. 3E, H) or A549 cells (Fig. 3F, I) largely rescues S  
209 phase entry. Similarly, co-depletion of *SKP2*'s degradation targets, p21 or p27 (Fig.  
210 3G, J; Supplementary Fig. 3L, M, N), largely reverses cell cycle arrest.

211 Exploring these phenotypes further through proliferation assays, we found that *SKP2*  
212 overexpression (Fig. 3K) or p21/p27 co-depletion (Fig. 3L) partially rescues the  
213 proliferation defects of *NUCKS1*-depleted cells. Finally, depletion of *NUCKS1* from  
214 *SKP2*-depleted cells has no additional effect on proliferation, supporting the idea that  
215 *SKP2* is a major determinant of *NUCKS1*'s effect on proliferation (Supplementary Fig.  
216 3O).

217 These results demonstrate that *NUCKS1* controls p21/p27 levels, cell cycle  
218 progression, and proliferation through its transcriptional stimulation of the *SKP2* gene,  
219 and identify the *NUCKS1*-*SKP2*-p21/p27 axis as a driving pathway for the G1/S  
220 transition.

## 221 **Analysis of NUCKS1 binding at the *SKP2* promoter**

222 To more comprehensively understand the regulation of *SKP2* by NUCKS1, we  
223 employed the electrophoretic mobility shift assay (EMSA), using a fluorescent *SKP2*  
224 promoter probe (Fig. 4A). To do this, we started by purifying NUCKS1 from Sf9 insect  
225 cells, which preserves NUCKS1's post-translational modifications (Fig. 4B). We found  
226 that in-tact, phosphorylated NUCKS1 displays a low affinity for the *SKP2* probe.  
227 However, dephosphorylation of NUCKS1 (using lambda phosphatase) increases the  
228 affinity of NUCKS1 for the *SKP2* probe almost 10-fold (Fig. 4C, D).

229 Since a previous publication reported a GC-box as a potential NUCKS1 binding site<sup>16</sup>,  
230 since there is a GC-box within the sequence of peak NUCKS1 binding to the *SKP2*  
231 promoter by ChIP-qPCR (Fig. 1C), and since recombinant NUCKS1 strongly binds the  
232 *SKP2* EMSA probe, which contains a GC-box (Fig. 4A), we mutated this sequence  
233 and performed competition EMSAs to investigate whether NUCKS1 exhibits specificity  
234 for this site. We found that the interaction of NUCKS1 with the labelled *SKP2* probe is  
235 readily outcompeted by a 100-fold excess of unlabelled WT *SKP2* probe, but not by  
236 an unlabelled mutant of the *SKP2* probe with no GC-box (Fig. 4E, F).

237 Finally, we performed EMSAs using WT and *NUCKS1*-KO nuclear extracts, and found  
238 that nuclear extracts from WT cells display a much higher affinity for the *SKP2* probe  
239 than extract from *NUCKS1*-KO cells (Fig. 4G, H).

240 Altogether, these results demonstrate that NUCKS1 directly interacts with the *SKP2*  
241 promoter's DNA. The data suggest that this binding occurs via a GC-box in the *SKP2*  
242 promoter, and may be regulated by the phosphorylation status of NUCKS1.

243 **DNA damage inhibits the NUCKS1-SKP2 axis through p53-dependent**  
244 **transcriptional repression**

245 DNA damage activates an ATM/p53-dependent pathway to instigate cell cycle arrest,  
246 delay DNA replication, and accomplish DNA repair<sup>56</sup>. To determine whether this  
247 response involves NUCKS1 or SKP2, we analysed the NUCKS1-SKP2 axis following  
248 induction of DNA damage. In U2OS cells (which express WT *TP53*, encoding p53),  
249 treatment with the chemotherapeutic drug 5-fluorouracil (5-FU) markedly reduces  
250 NUCKS1 and SKP2 protein levels, with concomitant upregulation of p21 (controlled  
251 by both p53 and SKP2), and p27 (controlled by SKP2) (Fig. 5A). 5-FU treatment also  
252 abolishes occupancy of NUCKS1 at the *SKP2* promoter (Fig. 5B), suggesting that  
253 downregulation of SKP2 is due to loss of NUCKS1 binding at its promoter. WT RPE1-  
254 hTERT cells treated with 5-FU similarly downregulate NUCKS1 and SKP2, and  
255 upregulate p21 and p27. However, this response is absent in *TP53*-KO RPE1-hTERT  
256 cells, suggesting a role for p53 in DNA damage-mediated NUCKS1/SKP2  
257 downregulation (Fig. 5C). Consistent with loss of SKP2, the stability of p21 and p27 is  
258 extended in 5-FU-treated cells, revealed through chase assays with the translation  
259 inhibitor cycloheximide (Supplementary Fig. 4A).

260 To investigate this putative role for p53, we used RT-qPCR to measure the mRNA  
261 levels of *NUCKS1* and *SKP2* after treatment with 5-FU, IR, hydrogen peroxide (H<sub>2</sub>O<sub>2</sub>),  
262 and camptothecin (CPT), DNA-damaging agents which induce distinct DNA lesions.  
263 Upregulation of *CDKN1A* mRNA, encoding p21, was used as a control for p53  
264 activation. We found that *NUCKS1* and *SKP2* transcripts are substantially reduced in  
265 response to all tested DNA-damaging agents (Fig. 5D). Consistent with Western  
266 blotting data, this is largely dependent on p53 (Fig. 5E-H). Induction of DNA damage  
267 also induces cell cycle changes which similarly depend on *TP53* status

268 (Supplementary Fig. 4B). These results demonstrate that DNA damage induces a p53  
269 response, involving downregulation of NUCKS1 and SKP2, upregulation of p21 and  
270 p27, and cell cycle arrest.

271 Next, we sought to understand the mechanism underpinning p53-dependent  
272 downregulation of NUCKS1 and SKP2. Much p53-mediated transcriptional repression  
273 relies on activation of the DREAM transcriptional repression complex by p53-induced  
274 p21<sup>57</sup>. To investigate whether this pathway is involved in the downregulation of  
275 NUCKS1 or SKP2, we treated WT and *CDKN1A*-knockout cells with 5-FU. As  
276 expected, transcripts of the p21-DREAM target *CCNB1*<sup>58</sup>, used as a positive control,  
277 are only reliably downregulated upon DNA damage in WT cells. However, transcripts  
278 of *NUCKS1* and *SKP2* are downregulated both in WT and *CDKN1A*-knockout cells,  
279 suggesting that *NUCKS1* and *SKP2* are not targets of the p21-DREAM pathway  
280 (Supplementary Fig. 4C-E).

281 Finally, we found that RNAi-mediated p53 depletion in TIG-1 cells, which express high  
282 endogenous p53 levels<sup>59</sup> (Supplementary Fig. 4F), as well as deletion of *TP53* from  
283 RPE1-hTERT cells (Supplementary Fig. 4G), increases *NUCKS1* levels, suggesting  
284 that p53 may regulate *NUCKS1/SKP2* expression both under basal conditions, as well  
285 as following p53 activation.

286 We propose that the p53-NUCKS1-SKP2-p21/p27 axis constitutes a checkpoint  
287 pathway for the G1/S transition, which may respond to DNA damage to prevent the  
288 replication of damaged DNA.

289

290 **Copy number gain and p53 loss contribute to *NUCKS1* and *SKP2***  
291 **overexpression in cancer**

292 Transcriptional overexpression of *NUCKS1* and *SKP2* has been reported in numerous  
293 cancer types<sup>18,33–36,38,46,60–62</sup>. Although some reports, focused on specific cancer  
294 types, attribute this to increased copy number<sup>33,37,39,46,61,63</sup>, no pan-cancer analyses  
295 have been performed, and the full mechanisms underlying the upregulation remain  
296 poorly defined. Seeking to explore this further, we analysed *NUCKS1* and *SKP2*  
297 expression in TCGA datasets. *NUCKS1* and *SKP2* are overexpressed in most TCGA  
298 datasets, including many shared cancer types (Fig. 6A, B). Consistent with oncogenic  
299 functions for *NUCKS1*<sup>39</sup> and *SKP2*<sup>62</sup>, both genes are subjected to copy number  
300 increase in many cancers, while deletions are rare (Fig. 6C, D). These results confirm  
301 that increased copy number of *NUCKS1* and *SKP2* can contribute to their  
302 overexpression in cancer.

303 Because we found that p53 negatively regulates levels of *NUCKS1* and *SKP2* (Fig. 5),  
304 we investigated the effect of p53 mutation in cancer. To do so, we used p53-proficient  
305 vs. -deficient HCT116 cells, and expressed WT p53 as well as its DNA-binding  
306 mutants, R175H, R248W, and R273H, which frequently drive cancer<sup>64</sup>. We found that  
307 p53-deficient HCT116 cells have increased levels of both *NUCKS1* and *SKP2*.  
308 Notably, overexpression of WT p53 - but not its DNA-binding mutants - substantially  
309 reduces *NUCKS1/SKP2* levels (Fig. 6E). These results further support our finding that  
310 p53 negatively regulates levels of *NUCKS1* and *SKP2*, and demonstrate that p53  
311 mutants defective for DNA-binding lose the ability to repress *NUCKS1/SKP2*.

312 Finally, we asked whether p53 mutations also affect *NUCKS1/SKP2* expression in  
313 cancer patients, using TCGA datasets. Consistent with our *in vitro* data, we found that

314 mutation of p53 correlates with overexpression of *NUCKS1/SKP2* in several cancer  
315 types (Fig. 6F).

316 Together, these results show that increased copy number, as well as p53 mutation,  
317 contribute to the overexpression of *NUCKS1* and *SKP2* in many cancers. This may  
318 enable cancer cells to proliferate in the absence of mitogenic stimulation, or in the  
319 presence of DNA damage.

## 320 **Discussion**

321 Here, we identify the *NUCKS1-SKP2-p21/p27* axis as a cell cycle checkpoint pathway,  
322 which responds antagonistically to mitogen and DNA damage input to control S phase  
323 entry. In early G1 cells and in the absence of mitogens, *NUCKS1* protein levels and  
324 chromatin retention are low, ensuring its inhibition in non-replicating cells. *NUCKS1* is  
325 upregulated and recruited to chromatin during G1/S progression, permitting *NUCKS1*  
326 to stimulate the expression of *SKP2*, the F-box component of the SCF<sup>SKP2</sup> ubiquitin  
327 ligase, leading to the degradation of p21/p27 and S phase entry. In contrast, DNA  
328 damage induces p53-dependent transcriptional repression of *NUCKS1*, leading to loss  
329 of *SKP2* and upregulation of p21/p27 for cell cycle arrest. Some cancer cells hijack  
330 this mechanism, increasing *NUCKS1/SKP2* copy numbers and transcriptionally  
331 upregulating *NUCKS1* and *SKP2* through p53 mutation. We propose that this may  
332 enable cancer cells to sustain proliferation, even in the absence of mitogens or in the  
333 presence of DNA damage (Fig. 7).

334 Our study identifies the *SKP2-p21/p27* pathway as the second pathway  
335 transcriptionally controlled by *NUCKS1*, after the insulin receptor pathway<sup>16</sup>. However,  
336 the question of precisely how *NUCKS1* regulates transcription remains unanswered.  
337 *NUCKS1* is known to bind chromatin with higher affinity than naked DNA, does not

338 bind ssDNA, and binds D-loops better than dsDNA<sup>19</sup>. NUCKS1 does not have a  
339 transcription activation domain, but promotes chromatin accessibility at - and recruits  
340 RNAPII to – its target promoters<sup>16</sup>. It is possible that NUCKS1 cooperates with other  
341 transcription factors to direct transcription; for example, NUCKS1 has been reported  
342 as an activator of NF- $\kappa$ B<sup>65</sup>. Since NF- $\kappa$ B regulates *SKP2* levels<sup>66</sup>, NUCKS1 may  
343 cooperate with NF- $\kappa$ B to control *SKP2* expression. Nevertheless, future work will focus  
344 on characterising NUCKS1's interactome, to more deeply investigate its mechanism  
345 for transcriptional regulation.

346 Our EMSA data (Fig. 4) and others' ChIP-Seq data<sup>16</sup> reveal that NUCKS1 displays  
347 affinity for the GC-box target sequence. The sequence we identify, GGCGGG, is  
348 present twice within the 600 nucleotide *SKP2* promoter, but is absent from the  
349 remaining ~45,000 nucleotides of the *SKP2* gene, which may explain the specificity of  
350 NUCKS1 for the *SKP2* promoter *in vivo*, and for other NUCKS1 targets more broadly.  
351 Going forward, research should focus on the structural basis of NUCKS1's interaction  
352 with the GC-box, and investigate whether NUCKS1 has multiple target DNA-binding  
353 sequences.

354 We show that p53 mediates the transcriptional downregulation of *NUCKS1* in  
355 response to DNA damage (Figure 5), but we do not fully characterise the mechanism.  
356 Binding of p53 at the *NUCKS1* promoter, with enrichment following DNA damage, has  
357 been detected as part of genome-wide ChIP-Seq studies<sup>32</sup>, and our data showing that  
358 the downregulation of *NUCKS1* following DNA damage is independent of p21-DREAM  
359 (Supplementary Fig. 4) suggest that *NUCKS1*'s repression may be a direct result of  
360 p53 binding. To explore this further, it would be useful to measure the rate of synthesis  
361 of new *NUCKS1* transcripts, as well as the stability of *NUCKS1* transcripts, to  
362 determine whether p53 controls *NUCKS1*'s transcription itself or the stability of its



363 mRNA. Complementary luciferase assays using the *NUCKS1* promoter could also  
364 reveal whether p53 controls the activity of the *NUCKS1* promoter. Furthermore, would  
365 mutation of a putative binding site for p53 in the *NUCKS1* promoter alter *NUCKS1*  
366 expression, DNA damage resistance, cell cycle progression, and proliferation? These  
367 experiments will form part of future studies.

368 NUCKS1 is the most post-translationally modified protein in the human proteome (for  
369 its size) and its major modification is phosphorylation<sup>23</sup>. NUCKS1 is phosphorylated  
370 by the G2/M cell cycle kinase CDK1 at S181, reducing NUCKS1 binding to DNA<sup>26,27</sup>,  
371 although the *in vivo* function of this phosphorylation is not completely understood.  
372 Interestingly, S181 phosphorylation of NUCKS1 could act to reset the level of  
373 chromatin-bound NUCKS1 for the daughter G1 phase, during which CDK1 activity is  
374 low, and explain the G1/S chromatin recruitment of NUCKS1 that we observe  
375 (Supplementary Fig. 2). Furthermore, the DDR kinase ATM promotes the indirect  
376 phosphorylation of NUCKS1 at S181 following DNA damage<sup>19,29,67</sup>. Therefore, ATM-  
377 dependent NUCKS1 phosphorylation could provide a secondary mechanism to p53-  
378 dependent transcriptional repression, to ensure NUCKS1's removal from cell cycle  
379 promoters after DNA damage, and warrants investigation in the future. Notably,  
380 phosphorylation of NUCKS1 at S181 may also explain our EMSA data, which reveal  
381 a significant increase in DNA-binding affinity following NUCKS1 dephosphorylation  
382 (Figure 4).

383 By stimulating the activity of RAD54, NUCKS1 promotes HR, the S/G2-specific DSB  
384 repair pathway<sup>19,22</sup>, demonstrating that NUCKS1 acts to maintain the fidelity of DNA  
385 replication. Consistent with this, we show that NUCKS1 levels remain high throughout  
386 S phase and into G2 (Fig. 2). These findings raise a model in which NUCKS1  
387 stimulates entry into S phase and promotes the fidelity of the ensuing DNA replication



388 through HR, after its role in S phase entry is achieved. Notably, this function would  
389 mirror that of other G1/S factors, which boost both S phase entry and DNA repair,  
390 including E2F1<sup>68</sup> and SKP2 itself<sup>49</sup>.

391 In summary, our study identifies NUCKS1 as an important factor for the G1/S  
392 transition, placing NUCKS1 within the SKP2-p21/p27 axis. Future studies will  
393 investigate NUCKS1's mechanism of transcriptional regulation, mechanisms for its  
394 regulation by posttranslational modification, and delve deeper into its roles in  
395 oncogenesis.

396

397

398

399

400

401

402

403

404

405

406

407

408 **Author contributions**

409 G.L.D. and A.J.L. conceived the study and were in charge of overall direction and  
410 planning. S.H., C.P.G., P.L. and A.J.L. performed experiments. All authors designed  
411 and analysed experiments. V.D. gave critical suggestions and provided reagents.  
412 A.J.L., K.R. and G.L.D. supervised the project. S.H., A.J.L., K.R. and G.L.D. wrote the  
413 manuscript. All authors read and approved the manuscript.

414 **Acknowledgements**

415 The authors thank Prof. I. Cheeseman (Department of Biology, Massachusetts  
416 Institute of Technology), Dr. R. Chapman (Nuffield Department of Medicine, University  
417 of Oxford) and Prof. S. Maheswaran (Massachusetts General Hospital Cancer Center,  
418 Harvard Medical School) for providing cell lines. We thank Prof. E. O'Neill (Department  
419 of Oncology, University of Oxford) for providing plasmids, Prof. A. Østvold  
420 (Department of Biochemistry, University of Oslo) for NUCKS1 antibodies, and Dr. S.  
421 Mukhopadhyay, Prof. N. Burgess-Brown (Structural Genomics Consortium, University  
422 of Oxford), and Dr. S. Khoronenkova (Department of Biochemistry, University of  
423 Cambridge) for their help with NUCKS1 purification. The authors thank present and  
424 past members of the Dianov and Ramadan labs for discussions and technical help.

425 G.L.D. is supported by grants from the Medical Research Council  
426 [H3RWGJ00.H302.1], Cancer Research UK [C5255/A15935], and the Russian  
427 Science Foundation grant (№19-74-20069). K.R. is supported by the Medical  
428 Research Council Programme (MC\_PC-12001/1 and MC\_UU-00001/1) and Breast  
429 Cancer Now (2019DecPR1406). S.H. was supported by the Radcliffe-Oncology  
430 Studentship at University College, University of Oxford.

431

432 **Competing interests**

433 The authors declare no competing interests.

434 **Materials and Correspondence**

435 Correspondence and material requests should be addressed to K.R.

436 **Data** **availability**

437 Source data are provided with this paper.

438 Supplementary Fig. 1A uses the SEEK database<sup>47</sup> (<http://seek.princeton.edu/>) and  
439 Genecodis3<sup>69</sup> (<http://genecodis.cnb.csic.es>). Fig. 1A and Supplementary Fig. 1C and  
440 1D were generated using data from GEPIA2<sup>70</sup> (<http://gepia2.cancer-pku.cn/#index>).  
441 Fig. 6A and B were generated using data from UCSC XENA (<https://xena.ucsc.edu/>),  
442 using RSEM norm count values from GTEX/TCGA normal datasets, and TCGA  
443 tumour datasets<sup>71</sup>. Fig. 6C, D and F were generated using data from CBioPortal<sup>72,73</sup>  
444 (<https://www.cbioportal.org/>).

445

446

447

448

449

450

451

452

453

## 454 **Methods**

### 455 **Cell culture**

456 Cell lines (Supplementary Table 1) were cultured in DMEM (Life Technologies) with  
457 15% (TIG-1, NBE1-hTERT<sup>74</sup>) or 10% (U2OS, U2OS *NUCKS1*-KO, RPE1-hTERT,  
458 RPE1-hTERT *TP53*-KO, RPE1-hTERT *CDKN1A*-KO<sup>75</sup>, HT29, A549 SKP2  
459 doxycycline-inducible<sup>76</sup>, DLD1, RKO, HCT116, HCT116 *TP53*-KO<sup>77</sup>, CACO2) FBS, at  
460 37°C in a humidified atmosphere with 5% CO<sub>2</sub>. All cells tested negative for  
461 mycoplasma. For ionising radiation, treatments were performed using a GSR-D1  
462 <sup>137</sup>Cs  $\gamma$ -irradiator (RPS Services) at a dose rate of 1.8 Gy/min.

### 463 **siRNA and plasmid transfections**

464 siRNA transfections were performed using Lipofectamine RNAiMAX, according to the  
465 manufacturer's instructions. Cells were transfected with 30 nM siRNA for 3-7 days.  
466 siRNA sequences used are as follows:

467 siCtrl: Eurogentec, SR-CL000-005; siNUCKS1 (1): GAGGCGAUCUGGAAAGAAU;  
468 siNUCKS1 (2): GGCAUCUAAAGCAGCUUCU; siNUCKS1 (3' UTR):  
469 GCAGGAGGGACUAGAGAAAUU; siSKP2: GCUUCACGUGGGGAUGGGA; sip21:  
470 GAUGGAACUUCGACUUUGU; sip27: AAGGUUGCAUACUGAGCCAAG; sip53:  
471 AAGACUCCAGUGGUAUCUAC.

472 Plasmid transfections were performed using Lipofectamine 3000, according to the  
473 manufacturer's instructions. Assays were performed 48 h after plasmid transfection.  
474 Plasmids used in the study are listed in Supplementary Table 2.

### 475 **CRISPR-Cas9 genome editing**

476 *NUCKS1* CRISPR/Cas9 KO plasmid (sc-413018) and *NUCKS1* HDR plasmid (sc-  
477 413018-HDR) were co-transfected into early passage U2OS cells. Cells were treated

478 with 5 µg/ml puromycin for 3 days to select successfully-transfected cells, and seeded  
479 as single cells. Colonies were expanded and successful clones were confirmed using  
480 RT-qPCR and Western blotting.

#### 481 **Western blotting**

482 Whole cell extracts were prepared as described previously<sup>78</sup>. Nuclear/chromatin  
483 fractionations were performed as described previously<sup>79</sup>. Proteins were resolved using  
484 SDS-PAGE and transferred onto Immobilon-FL PVDF membranes (Millipore).  
485 Membranes were blocked using Odyssey blocking buffer (Li-Cor) and blotted using  
486 the antibodies indicated in Supplementary Table 3. Western blot detection was  
487 performed using the Odyssey image analysis system (Li-Cor Biosciences). Analysis  
488 and quantification were performed using Image Studio Lite Ver 5.2.

#### 489 **RT-qPCR**

490 Total RNA was extracted using the RNeasy kit (QIAGEN). Reverse transcription was  
491 performed using the SuperScript II Reverse Transcriptase kit (Thermofisher). RT-  
492 qPCR was performed using Fast SYBR Green Master Mix (Thermofisher) and the  
493 7500 Fast Real-Time PCR System (Applied Biosystems), with the comparative CT  
494 method for quantification. Analysis was performed using 7500 Software v2.0.6.  
495 Reference genes used for RT-qPCR are *B2M/GAPDH/TBP*. Primer sequences are  
496 listed in Supplementary Table 4.

#### 497 **Protein expression and purification**

498 Production of baculoviral particles, infection of Sf9 cells, and expression of  
499 recombinant protein was performed as described previously<sup>80</sup>. Mid log phase  
500 *Spodoptera frugiperda* (Sf9) cells ( $2 \times 10^6$ /ml) were transfected with pDEST53-  
501 *NUCKS1* bacmid using Cellfectin II transfection reagent in a 6-well plate format,

502 according to the manufacturer's protocol. Following incubation for 5 days at 27 °C,  
503 medium containing P0 baculovirus was collected and stored at 4 °C, protected from  
504 light. Two sequential rounds of virus amplification were performed to generate higher  
505 titer P2 baculovirus stocks. Sf9 cells were infected with P2 virus (120 µg/50 ml Sf9),  
506 and incubated at 27 °C for 3 days on an orbital shaker. Cells were harvested by  
507 centrifugation (900 g, 20 min, 4 °C), washed with PBS, pelleted again, and then stored  
508 at -80 °C. Cell pellets were resuspended in buffer A (50 mM HEPES pH 7.5, 300 mM  
509 NaCl, 5% (w/v) glycerol) supplemented with 1 mM TCEP, and 1:500 (v/v) protease  
510 inhibitor cocktail (Sigma-Aldrich, P8849) (12 ml buffer A per 100-ml culture cell pellet),  
511 and lysed by sonication, followed by incubation with Benzonase (20 U/µl) for 30 min  
512 on ice. Cell lysate were clarified by centrifugation, and supernatant passed through a  
513 0.45-µm syringe filter. The supernatant was then supplemented with 5 mM imidazole  
514 prior to loading onto a 1-ml HisTrap column (GE Healthcare) attached to an AKTA  
515 system at 1 ml/min. After sample loading, the column was washed with buffer A  
516 containing 5 mM (10 column volumes (CV)) and 50 mM imidazole (10CV). NUCKS1  
517 was eluted with a linear 50-250 mM imidazole gradient (20CV) and 0.5 ml fractions  
518 were collected. His<sub>6</sub>-tagged NUCKS1-containing fractions were pooled, and dialysed  
519 against storage buffer (50 mM Tris pH 7.5, 150 mM NaCl, 5% (w/v) glycerol, 0.5 mM  
520 DTT). To improve purity, His<sub>6</sub>-tagged NUCKS1 was further purified by size-exclusion  
521 chromatography. 1.5 mg of HisTrap-purified NUCKS1 was diluted to 200 µl in storage  
522 buffer and loaded onto a Superdex 200 HR 10/30 column (GE Healthcare, Little  
523 Chalfont, UK), and 0.5 ml fractions collected.

## 524 **Immunofluorescence**

525 Cells seeded on coverslips were subjected to pre-extraction in a buffer containing 10  
526 mM HEPES, 100 mM NaCl, 0.3 M sucrose, 3 mM MgCl<sub>2</sub>, and 0.1% Triton X-100 for

527 two minutes, washed twice using a buffer containing 10 mM HEPES, 100 mM NaCl,  
528 0.3 M sucrose, and 3 mM MgCl<sub>2</sub>, and then fixed in 4% formaldehyde for 15 minutes  
529 on ice. Cells were blocked overnight in 5% BSA at 4°C, and primary antibodies  
530 (indicated in Supplementary Table 3) were diluted in 2.5% BSA and incubations  
531 performed for 1 h at RT. Cells were washed in PBS, incubated in secondary antibodies  
532 (indicated in Supplementary Table 3) for 1 h at RT, and stained with DAPI. Microscopy  
533 was performed using the Nikon NiE and quantification was performed using  
534 CellProfiler<sup>81</sup>.

### 535 **Site-directed mutagenesis**

536 NUCKS1's GRP DNA-binding motif was mutated to AAA using the Phusion Site-  
537 Directed Mutagenesis Kit (Thermofisher), with primers as follows:  
538 gccttgaaagctgtggcggcagccactttcccttgcc/ggcaaagggaagtggtgccgccacagctcaaaggc.  
539 Mutant *NUCKS1* was validated by sequencing.

### 540 **Comet assays**

541 Alkaline comet assays were performed as described previously<sup>82</sup>, using the Nikon NiE  
542 and Andor Komet7.1 software.

### 543 **Proliferation assays**

544 Cells were seeded at day 0, treated as indicated, and viable cells were counted at  
545 indicated days, using Trypan Blue staining (Life Technologies) and the Countess™  
546 Automated Cell Counter (Thermo Fisher Scientific).

### 547 **EMSAs**

548 For NUCKS1 EMSAs, recombinant NUCKS1 was dephosphorylated using lambda  
549 phosphatase (100 units/1 µg of recombinant NUCKS1), in the presence of Protein  
550 MetalloPhosphatases buffer and MnCl<sub>2</sub> (1 mM), for 90 min at 30 °C, followed by

551 addition of phosphatase inhibitor cocktail (50 x, Merck Millipore). Consequently,  
552 binding reactions using indicated quantities of intact or dephosphorylated NUCKS1, or  
553 WT or *NUCKS1*-KO nuclear extract, were set up in the presence of binding buffer (20  
554 mM Tris-HCl pH 7.5, 100 mM KCl, 0.2% NP-40, 20% glycerol, 2 mM DTT)  
555 supplemented with 50 ng or 1 µg salmon sperm DNA (for pure protein and nuclear  
556 extract, respectively). 25 nM double-stranded probes were added, and reactions were  
557 incubated for 15 min at 37 °C before loading on native 6% PAGE gels at 150 V for 50  
558 min. Gels were imaged using the Odyssey image analysis system (LiCor Biosciences).  
559 The double-stranded sequence of the *SKP2* probes used in EMSAs were  
560 Gccgaccagtcccgcctcccgcggggggttggtgggtatctcgaaggcgggtaaagctgca (WT *SKP2* probe)  
561 and GccgaccagtcccgcctcccgcggggggttggtgggtatctcgaaAAAAAataagctgca (mutant  
562 *SKP2* probe). The WT probe was IRDye-800 fluorescence-labelled. In competition  
563 assays, unlabelled probes were included in binding reactions at 100-times the  
564 concentration of labelled probes. Analysis and quantification were performed using  
565 Image Studio Lite Ver 5.2.

## 566 **ChIP-qPCR**

567 ChIP was performed as previously described<sup>59</sup>, using U2OS cells fixed in 1%  
568 formaldehyde for 15 min, ensuring sonication fragments between 100 and 500 bp, and  
569 using 5 µg anti-NUCKS1 antibody (ProteinTech 12023-2-AP) or 5 µg normal rabbit  
570 IgG (SantaCruz sc2027). Primers used for ChIP-qPCR are listed in Supplementary  
571 Table 4.

## 572 **Flow cytometry**

573 For propidium iodide staining, trypsinised cells were fixed in cold 70% ethanol for 30  
574 min on ice. Cells were then centrifuged at 250 g for 5 min and resuspended in PBS  
575 with 0.5 µg/ml RNaseA and 10 µg/ml propidium iodide, before incubation for 15 min



576 at 37 °C.

577 For EdU/PI staining, the Click-iT™ Plus EdU Alexa Fluor™ 488 Flow Cytometry Assay  
578 Kit was used, according to the manufacturer's instructions.

579

580 The BD FACSCalibur™ (BD Biosciences) or CytoFLEX (Beckman Coulter) machines  
581 were used for sample acquisition. FlowJo v10.6.1 and ModFit LT 4.1.7 were used for  
582 analysis.

### 583 **Bioinformatics**

584 Bioinformatics screens for putative transcriptional targets of *NUCKS1*, as outlined in  
585 Supplementary Fig. 1A, were performed using the SEEK database<sup>47</sup>  
586 (<http://seek.princeton.edu/>). The SEEK database was used to generate lists of the  
587 1000 genes correlating most positively with *NUCKS1* across 15 different cancer types,  
588 with three sample types per cancer (cancer tissue, tumour tissue, or cell line). This  
589 generated 45 lists of 1,000 genes, which were subsequently, independently, filtered  
590 through *NUCKS1*-interacting promoters in ChIP-Seq data<sup>16</sup> (Supplementary Fig. 1A).  
591 The GO biological processes enrichment presented in Supplementary Fig. 1A was  
592 generated using Genecodis3<sup>69</sup> (<http://genecodis.cnb.csic.es>). Fig. 1A and  
593 supplementary Fig. 1C and 1D were generated using data from GEPIA2<sup>70</sup>  
594 (<http://gepia2.cancer-pku.cn/#index>). Fig. 6A and B were generated using data from  
595 UCSC XENA (<https://xena.ucsc.edu/>), using RSEM norm count values from  
596 GTEX/TCGA normal datasets, and TCGA tumour datasets<sup>71</sup>. Fig. 6C, D and F were  
597 generated using data from CBioPortal<sup>72,73</sup> (<https://www.cbioportal.org/>).

### 598 **Statistical analyses**

599 Statistical tests, indicated in figure legends, were performed using GraphPad Prism 8.

## 600 **Figure legends**

### 601 **Fig. 1: NUCKS1 transcriptionally controls the SKP2-p21/p27 axis**

- 602 A) Pearson's correlation (two-tailed) of *NUCKS1* and *SKP2* mRNAs from TCGA  
603 datasets, made using data from GEPIA2<sup>70</sup>.
- 604 B) Map of human *SKP2* promoter annotated with sequence positions of ChIP-  
605 qPCR primers.
- 606 C) ChIP-qPCR of *NUCKS1* on the *SKP2* promoter in U2OS cells. Ordinary one-  
607 way ANOVA with Dunnett's multiple comparisons test, using -25 - +148 as a  
608 reference. Data are presented as mean +/- SEM from 3 independent  
609 experiments. p-values are in order as follows: 0.0001, 0.0004, 0.0007, 0.0058,  
610 0.0051, 0.0016, 0.0006, 0.0002, 0.0002.
- 611 D) Left: RT-qPCR after control or siRNA-mediated *NUCKS1* depletion. The  
612 dotted line denotes mRNA levels in siCtrl-treated cells. Right: RT-qPCR in two  
613 different clones of *NUCKS1*-KO U2OS cells. The dotted line denotes mRNA  
614 levels in WT U2OS cells. Left: One-way ANOVA with Sidak multiple  
615 comparisons test. Right: One-way ANOVA with Dunnett's multiple  
616 comparisons test. Data are presented as mean +/- SEM from 1-4 independent  
617 experiments. p-values are in order as follows: <0.0001, <0.0001, <0.0001,  
618 <0.0001, <0.0001, <0.0001, 0.0015, <0.0001.
- 619 E) Western blot in control- or *NUCKS1*-depleted RPE1-hTERT cells.  
620 Representative of 3 independent experiments.

621 MW: molecular weight, kDa: kilodaltons. Source data are provided as a source data  
622 file.

### 623 **Fig. 2: NUCKS1 levels and chromatin-binding are induced in late G1 to promote** 624 ***SKP2* expression and G1/S progression**

- 625 A) Western blot in whole cell extracts of RPE1-hTERT cells synchronised to  
626 G0/G1 by 72 h contact inhibition ( $t=0$ ) followed by re-plating at low density to  
627 release cells into S phase. Representative of 3 independent experiments.
- 628 B) RT-qPCR in RPE1-hTERT cells treated as in A. Data are presented as mean  
629 +/- SEM from 3 independent experiments.
- 630 C) Western blot in the chromatin fraction of RPE1-hTERT cells starved of serum  
631 for 48 h ( $t=0$ ) followed by mitogenic stimulation (15% FBS) for the indicated  
632 periods of time. Representative of 2 independent experiments.
- 633 D) PI cell cycle profiles of control, *NUCKS1*-, or *SKP2*-depleted RPE1-hTERT  
634 cells treated as in A. Representative of 3 independent experiments.
- 635 E) Quantification of D. Data are presented as mean +/- SEM from 3 independent  
636 experiments.

637 MW: molecular weight, kDa: kilodaltons, PI: propidium iodide. Source data are  
638 provided as a source data file.

639 **Fig. 3: NUCKS1 controls S phase entry through the SKP2-p21/p27 axis**

- 640 A) EdU/PI cell cycle profiles of WT U2OS cells and three different clones of  
641 *NUCKS1*-KO cells (left) and corresponding quantifications (right). Ordinary  
642 one-way ANOVA with Dunnett multiple comparisons test on S phase  
643 population.  
644 B) EdU/PI cell cycle profiles of WT and *NUCKS1*-KO U2OS cells expressing the  
645 indicated variants of *NUCKS1* (left) and corresponding quantifications (right).  
646 C) Proliferation assay in WT U2OS cells and three different clones of *NUCKS1*-  
647 KO cells.  
648 D) SKP2 overexpression largely rescues p21/p27 accumulation in *NUCKS1*-  
649 depleted HCT116 cells, measured by Western blot.  
650 E) SKP2 overexpression largely rescues HCT116 EdU/PI cell cycle profiles  
651 following treatment with control or *NUCKS1* siRNA.  
652 F) SKP2 overexpression largely rescues EdU/PI cell cycle profiles in A549 cells  
653 treated with control or *NUCKS1* siRNA.  
654 G) EdU/PI cell cycle profiles of HCT116 cells treated with control, p21, p27, or  
655 *NUCKS1* siRNAs.  
656 H) Quantification of HCT116 SKP2 cell cycle profiles in E.  
657 I) Quantification of A549 SKP2 cell cycle profiles in F.  
658 J) Quantification of HCT116 p21/p27 cell cycle profiles in G.  
659 K) SKP2 overexpression partially rescues proliferation following *NUCKS1*  
660 depletion in A549 cells.  
661 L) Proliferation assay in RPE1-hTERT cells treated with control, *NUCKS1*, p21  
662 or p27 siRNAs.

663 In A (left), B (left), D, E, F, and G, data are representative of 3 (A, D) or 2 (B, E,  
664 F, G) independent experiments. In A (right), B (right), C, H, I, J, K, and L, data are  
665 presented as mean  $\pm$  SEM from 3 (A, C, K, L) or 2 (B, H, I, J) independent  
666 experiments.

667 MW: molecular weight, kDa: kilodaltons, PI: propidium iodide. Source data are  
668 provided as a source data file.

669 **Fig. 4: Analysis of NUCKS1 binding at the SKP2 promoter.**

- 670 a) Schematic showing sequence positions of the EMSA probe in relation to  
671 *SKP2*'s transcription start site (TSS) and the region giving peak binding in our  
672 ChIP-qPCR assays.  
673 b) Coomassie gel demonstrating *NUCKS1* purification. Treatment with lambda  
674 phosphatase removes *NUCKS1* phosphorylation and reduces its molecular  
675 weight.

- 676 c) Titration of phosphorylated or dephosphorylated NUCKS1 (10.24, 25.6, 64,  
677 160, 400, 1000, 2500 nM) with the *SKP2* promoter probe.  
678 d) Quantification of C.  
679 e) Titration of phosphorylated or dephosphorylated NUCKS1 with the *SKP2*  
680 promoter probe. In lanes 6/12 and 7/13, respectively, 100 X molar quantity of  
681 unlabelled WT or mutant *SKP2* probe were added as competition in binding  
682 reactions.  
683 f) Quantification of E.  
684 g) Titration of WT or *NUCKS1*-KO U2OS nuclear extract with the *SKP2* promoter  
685 probe. In lanes 6 and 11, 100 X molar quantity of unlabelled WT probe was  
686 added as competition in binding reactions.  
687 h) Quantification of G.

688 In B, C, E, and G, data are representative of 2 (B), 4 (C), or 3 (E, G) independent  
689 experiments. In D, F, and H, data are presented as mean +/- SEM from 4 (D) or 3 (F,  
690 H) independent experiments.

691 MW: molecular weight, kDa: kilodaltons. Source data are provided as a source data  
692 file.

693 **Fig. 5: DNA damage inhibits the NUCKS1-SKP2 axis through p53-mediated**  
694 **transcriptional repression**

- 695 a) Western blot in WT U2OS cells treated with 50  $\mu$ M 5-FU for 24 or 48 h.  
696 b) ChIP-qPCR of NUCKS1 on the *SKP2* promoter in U2OS cells after 50  $\mu$ M 5-  
697 FU for 48 h.  
698 c) Western blot in RPE1-hTERT WT and *TP53*-KO cells treated with 10  $\mu$ M 5-FU  
699 for 24 or 48 h.  
700 d) RT-qPCR in WT RPE1-hTERT cells treated with 5-FU (10  $\mu$ M), IR (4 Gy),  
701 H<sub>2</sub>O<sub>2</sub> (200  $\mu$ M), or CPT (100 nM) for 24 or 48 h. Ordinary two-way ANOVA  
702 with Dunnett's multiple comparisons test.  
703 e) RT-qPCR after 5-FU (10  $\mu$ M) in RPE1-hTERT WT or *TP53*-KO cells.  
704 f) RT-qPCR after IR (4 Gy) in RPE1-hTERT WT or *TP53*-KO cells.  
705 g) RT-qPCR after H<sub>2</sub>O<sub>2</sub> (200  $\mu$ M) in RPE1-hTERT WT or *TP53*-KO cells.  
706 h) RT-qPCR after CPT (100 nM) in RPE1-hTERT WT or *TP53*-KO cells.

707 In A and C, data are representative of 3 independent experiments. In B, D, E, F, G,  
708 and H, data are presented as mean +/- SEM from 3 (B, H), 3-5 (D) or 2 (E-G)  
709 independent experiments.

710 MW: molecular weight, kDa: kilodaltons. Source data are provided as a source data  
711 file.

712

713 **Fig. 6: Copy number gain and p53 loss contribute to *NUCKS1* and *SKP2***  
714 **overexpression in cancer**

715 A) *NUCKS1* expression in normal vs. tumour tissue, using data from UCSC  
716 Xena<sup>71</sup>. In A and B, box plots show median values along with 25/75% (box)  
717 and 10/90% (whiskers). Statistics were analysed using Kruskal Wallis with  
718 Dunn's post test. p-values are in order as follows: <0.0001, <0.0001, <0.0001,  
719 >0.9999, <0.0001, 0.1198, <0.0001, >0.9999, >0.9999, 0.0148, <0.0001,  
720 0.0019, <0.0001, >0.9999, <0.0001, <0.0001, <0.0001, <0.0001, <0.0001,  
721 0.0187, <0.0001, 0.6879, <0.0001, >0.9999, <0.0001, <0.0001, <0.0001,  
722 >0.9999, <0.0001, <0.0001, >0.9999.

723 B) *SKP2* expression in normal vs. tumour tissue, using data from UCSC Xena<sup>71</sup>.  
724 p-values are in order as follows: <0.0001, <0.0001, 0.0002, <0.0001, <0.0001,  
725 <0.0001, <0.0001, <0.0001, >0.9999, <0.0001, <0.0001, <0.0001, >0.9999,  
726 <0.0001, 0.0476, 0.3634, <0.0001, <0.0001, <0.0001, <0.0001, >0.9999,  
727 >0.9999, >0.9999, 0.3562, <0.0001, <0.0001, <0.0001, >0.9999, 0.0023,  
728 <0.0001, 0.0006.

729 C) *NUCKS1* copy number changes in cancer, using data from TCGA PanCancer  
730 Atlas datasets in CBioPortal<sup>72,73</sup>.

731 D) *SKP2* copy number changes in cancer, using data from TCGA PanCancer  
732 Atlas datasets in CBioPortal<sup>72,73</sup>.

733 E) Western blot and RT-qPCR in p53 proficient vs. deficient HCT116 cells  
734 expressing indicated variants of p53. Ordinary one-way ANOVA with Tukey's  
735 multiple comparisons test. Upper: data are presented as mean +/- SEM from  
736 3 independent experiments. Lower: data are representative of 3 independent  
737 experiments. ns p-values are in order as follows – *NUCKS1*: 0.8983, 0.8478,  
738 0.9995; *SKP2*: 0.9412, 0.9984, 0.9786; *CDKN1A*: 0.9999, 0.9802, 0.9334.

739 F) Analysis of *TP53*, *NUCKS1*, *SKP2* or *XPC* (used as a positive control for p53  
740 activity) mRNA levels in WT vs. *TP53* mutant tumours, using PanCancer Atlas  
741 or METABRIC datasets in CBioPortal<sup>72,73</sup>. Units: log RNA Seq V2 RSEM  
742 (ESCA-BRCA) and mRNA expression microarray (METABRIC). Box plots  
743 show median values along with 25/75% (box) and 10/90% (whiskers) and  
744 outliers. Two-tailed Mann-Whitney test. ESCA p53 WT n=24 patients, p53  
745 mutant n=157 patients. LUSC p53 WT n=79 patients, p53 mutant n=402  
746 patients. UCEC p53 WT n=323 patients, p53 mutant n=192 patients. BRCA  
747 p53 WT n=717 patients, p53 mutant n=347 patients. METABRIC p53 WT  
748 1245 patents, p53 mutant n=659 patients.

749 MW: molecular weight, kDa: kilodaltons. Source data are provided as a source data  
750 file.

751

752

753 **Fig. 7: Model depicting the role for NUCKS1 in the S phase entry decision.**

754 The NUCKS1-SKP2-p21/p27 axis constitutes a signalling hub which integrates the  
755 opposing cell cycle signals, mitogens and DNA damage.

756 Mitogens stimulate binding of NUCKS1 to the *SKP2* promoter, *SKP2* expression,  
757 p21/p27 degradation, and S phase entry.

758 DNA damage induces p53-dependent repression of *NUCKS1*, leading to *SKP2*'s  
759 transcriptional downregulation, upregulation of p21/p27, and cell cycle arrest.

760 Some cancer cells increase *NUCKS1/SKP2* copy number and mutate p53, leading to  
761 *NUCKS1* and *SKP2* overexpression.

762 CNA: copy number alteration.

763

764

765

766

767

768

769

770

771

772

773

774

775

776

777

778

779

780

781



## 782 References

- 783 1. Neganova, I. & Lako, M. G1 to S phase cell cycle transition in somatic and  
784 embryonic stem cells. *J. Anat.* **213**, 30–44 (2008).
- 785 2. Khoronenkova, S. V & Dianov, G. L. ATM prevents DSB formation by  
786 coordinating SSB repair and cell cycle progression. *Proc. Natl. Acad. Sci. U. S.*  
787 *A.* **112**, 3997–4002 (2015).
- 788 3. Macheret, M. & Halazonetis, T. D. Intragenic origins due to short G1 phases  
789 underlie oncogene-induced DNA replication stress. *Nature* **555**, 112–116  
790 (2018).
- 791 4. Halazonetis, T. D., Gorgoulis, V. G. & Bartek, J. An oncogene-induced DNA  
792 damage model for cancer development. *Science* **319**, 1352–1355 (2008).
- 793 5. Hills, S. A. & Diffley, J. F. X. DNA replication and oncogene-induced replicative  
794 stress. *Curr. Biol.* **24**, R435–44 (2014).
- 795 6. Hume, S., Dianov, G. L. & Ramadan, K. A unified model for the G1/S cell cycle  
796 transition. *Nucleic Acids Res.* **48**, 12483–12501 (2020).
- 797 7. Pennycook, B. R. & Barr, A. R. Restriction point regulation at the crossroads  
798 between quiescence and cell proliferation. *FEBS Lett.* (2020).  
799 doi:10.1002/1873-3468.13867
- 800 8. Rubin, S. M., Sage, J. & Skotheim, J. M. Integrating Old and New Paradigms  
801 of G1/S Control. *Mol. Cell* **80**, 183–192 (2020).
- 802 9. Bartek, J. & Lukas, J. Pathways governing G1/S transition and their response  
803 to DNA damage. *FEBS Lett.* **490**, 117–122 (2001).
- 804 10. Spencer, S. L. *et al.* The proliferation-quiescence decision is controlled by a  
805 bifurcation in CDK2 activity at mitotic exit. *Cell* **155**, 369–383 (2013).
- 806 11. Yang, H. W., Chung, M., Kudo, T. & Meyer, T. Competing memories of  
807 mitogen and p53 signalling control cell-cycle entry. *Nature* (2017).  
808 doi:10.1038/nature23880
- 809 12. Heldt, F. S., Barr, A. R., Cooper, S., Bakal, C. & Novak, B. A comprehensive  
810 model for the proliferation-quiescence decision in response to endogenous  
811 DNA damage in human cells. *Proc. Natl. Acad. Sci. U. S. A.* **115**, 2532–2537  
812 (2018).
- 813 13. Barr, A. R. *et al.* DNA damage during S-phase mediates the proliferation-  
814 quiescence decision in the subsequent G1 via p21 expression. *Nat. Commun.*  
815 (2017). doi:10.1038/ncomms14728
- 816 14. Barr, A. R., Heldt, F. S., Zhang, T., Bakal, C. & Novák, B. A Dynamical  
817 Framework for the All-or-None G1/S Transition. *Cell Syst.* **2**, 27–37 (2016).
- 818 15. Bianchi, M. E. & Agresti, A. HMG proteins: dynamic players in gene regulation  
819 and differentiation. *Curr. Opin. Genet. Dev.* **15**, 496–506 (2005).

- 820 16. Qiu, B. *et al.* NUCKS is a positive transcriptional regulator of insulin signaling.  
821 *Cell Rep.* **7**, 1876–1886 (2014).
- 822 17. Yuan, X. *et al.* NUCKS1 is a novel regulator of milk synthesis in and  
823 proliferation of mammary epithelial cells via the mTOR signaling pathway. *J.*  
824 *Cell. Physiol.* (2019). doi:10.1002/jcp.28240
- 825 18. Huang, Y.-K. *et al.* NUCKS1 promotes gastric cancer cell aggressiveness by  
826 upregulating IGF-1R and subsequently activating the PI3K/Akt/mTOR  
827 signaling pathway. *Carcinogenesis* **40**, 370–379 (2019).
- 828 19. Parpys, A. C. *et al.* NUCKS1 is a novel RAD51AP1 paralog important for  
829 homologous recombination and genome stability. *Nucleic Acids Res.* **43**,  
830 9817–9834 (2015).
- 831 20. Yue, Y. *et al.* Nucks1 synergizes with Trp53 to promote radiation  
832 lymphomagenesis in mice. *Oncotarget* **7**, 61874–61889 (2016).
- 833 21. De Angelis, P. M. *et al.* Nondysplastic Ulcerative Colitis Has High Levels of the  
834 Homologous Recombination Repair Protein NUCKS1 and Low Levels of the  
835 DNA Damage Marker Gamma-H2AX. *Inflamm. Bowel Dis.* **24**, 593–600  
836 (2018).
- 837 22. Maranon, D. G. *et al.* NUCKS1 promotes RAD54 activity in homologous  
838 recombination DNA repair. *J. Cell Biol.* **219**, (2020).
- 839 23. Wisniewski, J. R. *et al.* Constitutive and dynamic phosphorylation and  
840 acetylation sites on NUCKS, a hypermodified nuclear protein, studied by  
841 quantitative proteomics. *Proteins* **73**, 710–718 (2008).
- 842 24. Malumbres, M. & Barbacid, M. Cell cycle, CDKs and cancer: a changing  
843 paradigm. *Nat. Rev. Cancer* **9**, 153–166 (2009).
- 844 25. Ostvold, A. C., Holtlund, J. & Laland, S. G. A novel, highly phosphorylated  
845 protein, of the high-mobility group type, present in a variety of proliferating and  
846 non-proliferating mammalian cells. *Eur. J. Biochem.* **153**, 469–475 (1985).
- 847 26. Grundt, K. *et al.* A putative DNA-binding domain in the NUCKS protein. *Arch.*  
848 *Biochem. Biophys.* **407**, 168–175 (2002).
- 849 27. Grundt, K., Haga, I. V, Huitfeldt, H. S. & Ostvold, A. C. Identification and  
850 characterization of two putative nuclear localization signals (NLS) in the DNA-  
851 binding protein NUCKS. *Biochim. Biophys. Acta* **1773**, 1398–1406 (2007).
- 852 28. Ostvold, A. C. *et al.* Molecular cloning of a mammalian nuclear phosphoprotein  
853 NUCKS, which serves as a substrate for Cdk1 in vivo. *Eur. J. Biochem.* **268**,  
854 2430–2440 (2001).
- 855 29. Matsuoka, S. *et al.* ATM and ATR substrate analysis reveals extensive protein  
856 networks responsive to DNA damage. *Science* **316**, 1160–1166 (2007).
- 857 30. Grundt, K., Thiede, B. & Østvold, A. C. Identification of kinases  
858 phosphorylating 13 sites in the nuclear, DNA-binding protein NUCKS.  
859 *Biochim. Biophys. acta. Proteins proteomics* **1865**, 359–369 (2017).



- 860 31. Chicas, A. *et al.* Dissecting the unique role of the retinoblastoma tumor  
861 suppressor during cellular senescence. *Cancer Cell* **17**, 376–387 (2010).
- 862 32. Nikulenkov, F. *et al.* Insights into p53 transcriptional function via genome-wide  
863 chromatin occupancy and gene expression analysis. *Cell Death Differ.* **19**,  
864 1992–2002 (2012).
- 865 33. Qiu, B., Han, W. & Tergaonkar, V. NUCKS: a potential biomarker in cancer  
866 and metabolic disease. *Clin. Sci. (Lond)*. **128**, 715–721 (2015).
- 867 34. Shi, C. *et al.* NUCKS nuclear elevated expression indicates progression and  
868 prognosis of ovarian cancer. *Tumour Biol.* **39**, 1010428317714631 (2017).
- 869 35. Liu, T. *et al.* Increased NUCKS expression is a risk factor for poor prognosis  
870 and recurrence in endometrial cancer. *Am. J. Cancer Res.* **5**, 3659–3667  
871 (2015).
- 872 36. Drosos, Y. *et al.* NUCKS overexpression in breast cancer. *Cancer Cell Int.* **9**,  
873 19 (2009).
- 874 37. Kikuchi, A. *et al.* Identification of NUCKS1 as a colorectal cancer prognostic  
875 marker through integrated expression and copy number analysis. *Int. J. cancer*  
876 **132**, 2295–2302 (2013).
- 877 38. Gu, L. *et al.* NUCKS1 overexpression is a novel biomarker for recurrence-free  
878 survival in cervical squamous cell carcinoma. *Tumour Biol.* **35**, 7831–7836  
879 (2014).
- 880 39. Cheong, J. Y. *et al.* Identification of NUCKS1 as a putative oncogene and  
881 immunodiagnostic marker of hepatocellular carcinoma. *Gene* **584**, 47–53  
882 (2016).
- 883 40. Zhao, S. *et al.* NUCKS1 Promotes Proliferation, Invasion and Migration of Non-  
884 Small Cell Lung Cancer by Upregulating CDK1 Expression. *Cancer Manag.*  
885 *Res.* **12**, 13311–13323 (2020).
- 886 41. Cardozo, T. & Pagano, M. The SCF ubiquitin ligase: insights into a molecular  
887 machine. *Nat. Rev. Mol. Cell Biol.* **5**, 739–751 (2004).
- 888 42. Abbas, T. & Dutta, A. p21 in cancer: intricate networks and multiple activities.  
889 *Nat. Rev. Cancer* **9**, 400–414 (2009).
- 890 43. Chu, I. M., Hengst, L. & Slingerland, J. M. The Cdk inhibitor p27 in human  
891 cancer: prognostic potential and relevance to anticancer therapy. *Nat. Rev.*  
892 *Cancer* **8**, 253–267 (2008).
- 893 44. Carrano, A. C., Eytan, E., Hershko, A. & Pagano, M. SKP2 is required for  
894 ubiquitin-mediated degradation of the CDK inhibitor p27. *Nat. Cell Biol.* **1**, 193–  
895 199 (1999).
- 896 45. Bornstein, G. *et al.* Role of the SCFSkp2ubiquitin ligase in the degradation of  
897 p21Cip1 in S phase. *J. Biol. Chem.* (2003). doi:10.1074/jbc.M301774200
- 898 46. Frescas, D. & Pagano, M. Deregulated proteolysis by the F-box proteins SKP2

- 899 and beta-TrCP: tipping the scales of cancer. *Nat. Rev. Cancer* **8**, 438–449  
900 (2008).
- 901 47. Zhu, Q. *et al.* Targeted exploration and analysis of large cross-platform human  
902 transcriptomic compendia. *Nat. Methods* **12**, 211–4, 3 p following 214 (2015).
- 903 48. Kitagawa, M., Lee, S. H. & McCormick, F. Skp2 suppresses p53-dependent  
904 apoptosis by inhibiting p300. *Mol. Cell* **29**, 217–231 (2008).
- 905 49. Wu, J. *et al.* Skp2 E3 ligase integrates ATM activation and homologous  
906 recombination repair by ubiquitinating NBS1. *Mol. Cell* **46**, 351–361 (2012).
- 907 50. Imaki, H. *et al.* Cell cycle-dependent regulation of the Skp2 promoter by GA-  
908 binding protein. *Cancer Res.* **63**, 4607–4613 (2003).
- 909 51. Yam, C. H., Fung, T. K. & Poon, R. Y. C. Cyclin A in cell cycle control and  
910 cancer. *Cell. Mol. Life Sci.* **59**, 1317–1326 (2002).
- 911 52. Bashir, T., Dorrello, N. V., Amador, V., Guardavaccaro, D. & Pagano, M.  
912 Control of the SCF(Skp2-Cks1) ubiquitin ligase by the APC/C(Cdh1) ubiquitin  
913 ligase. *Nature* **428**, 190–193 (2004).
- 914 53. Moldovan, G.-L., Pfander, B. & Jentsch, S. PCNA, the maestro of the  
915 replication fork. *Cell* **129**, 665–679 (2007).
- 916 54. Schroering, A. G., Edelbrock, M. A., Richards, T. J. & Williams, K. J. The cell  
917 cycle and DNA mismatch repair. *Exp. Cell Res.* **313**, 292–304 (2007).
- 918 55. Meloche, S. & Pouyssegur, J. The ERK1/2 mitogen-activated protein kinase  
919 pathway as a master regulator of the G1- to S-phase transition. *Oncogene* **26**,  
920 3227–3239 (2007).
- 921 56. Vousden, K. H. & Prives, C. Blinded by the Light: The Growing Complexity of  
922 p53. *Cell* **137**, 413–431 (2009).
- 923 57. Engeland, K. Cell cycle arrest through indirect transcriptional repression by  
924 p53: I have a DREAM. *Cell Death Differ.* **25**, 114–132 (2018).
- 925 58. Fischer, M., Quaas, M., Steiner, L. & Engeland, K. The p53-p21-DREAM-  
926 CDE/CHR pathway regulates G2/M cell cycle genes. *Nucleic Acids Res.* **44**,  
927 164–174 (2016).
- 928 59. Poletto, M., Legrand, A. J., Fletcher, S. C. & Dianov, G. L. p53 coordinates  
929 base excision repair to prevent genomic instability. *Nucleic Acids Res.* **44**,  
930 3165–3175 (2016).
- 931 60. Yokoi, S. *et al.* Amplification and overexpression of SKP2 are associated with  
932 metastasis of non-small-cell lung cancers to lymph nodes. *Am. J. Pathol.* **165**,  
933 175–180 (2004).
- 934 61. Zhu, C. Q. *et al.* Skp2 gene copy number aberrations are common in non-  
935 small cell lung carcinoma, and its overexpression in tumors with ras mutation  
936 is a poor prognostic marker. *Clin. cancer Res. an Off. J. Am. Assoc. Cancer*  
937 *Res.* **10**, 1984–1991 (2004).

- 938 62. Gstaiger, M. *et al.* Skp2 is oncogenic and overexpressed in human cancers.  
939 *Proc. Natl. Acad. Sci. U. S. A.* **98**, 5043–5048 (2001).
- 940 63. Rose, A. E. *et al.* Clinical relevance of SKP2 alterations in metastatic  
941 melanoma. *Pigment Cell Melanoma Res.* **24**, 197–206 (2011).
- 942 64. Muller, P. A. J. & Vousden, K. H. p53 mutations in cancer. *Nat. Cell Biol.* **15**,  
943 2–8 (2013).
- 944 65. Poon, M.-W. *et al.* Inhibition of NUCKS Facilitates Corneal Recovery Following  
945 Alkali Burn. *Sci. Rep.* **7**, 41224 (2017).
- 946 66. Schneider, G. *et al.* IKKalpha controls p52/RelB at the skp2 gene promoter to  
947 regulate G1- to S-phase progression. *EMBO J.* **25**, 3801–3812 (2006).
- 948 67. Bensimon, A. *et al.* ATM-dependent and -independent dynamics of the nuclear  
949 phosphoproteome after DNA damage. *Sci. Signal.* **3**, rs3 (2010).
- 950 68. Ren, B. *et al.* E2F integrates cell cycle progression with DNA repair,  
951 replication, and G(2)/M checkpoints. *Genes Dev.* **16**, 245–256 (2002).
- 952 69. Tabas-Madrid, D., Nogales-Cadenas, R. & Pascual-Montano, A. GeneCodis3:  
953 a non-redundant and modular enrichment analysis tool for functional  
954 genomics. *Nucleic Acids Res.* **40**, W478-83 (2012).
- 955 70. Tang, Z., Kang, B., Li, C., Chen, T. & Zhang, Z. GEPIA2: an enhanced web  
956 server for large-scale expression profiling and interactive analysis. *Nucleic  
957 Acids Res.* (2019). doi:10.1093/nar/gkz430
- 958 71. Goldman, M. J. *et al.* Visualizing and interpreting cancer genomics data via the  
959 Xena platform. *Nature biotechnology* **38**, 675–678 (2020).
- 960 72. Cerami, E. *et al.* The cBio cancer genomics portal: an open platform for  
961 exploring multidimensional cancer genomics data. *Cancer Discov.* **2**, 401–404  
962 (2012).
- 963 73. Gao, J. *et al.* Integrative analysis of complex cancer genomics and clinical  
964 profiles using the cBioPortal. *Sci. Signal.* **6**, pl1 (2013).
- 965 74. Stead, L. F. *et al.* The transcriptional consequences of somatic amplifications,  
966 deletions, and rearrangements in a human lung squamous cell carcinoma.  
967 *Neoplasia* **14**, 1075–1086 (2012).
- 968 75. McKinley, K. L. & Cheeseman, I. M. Large-Scale Analysis of CRISPR/Cas9  
969 Cell-Cycle Knockouts Reveals the Diversity of p53-Dependent Responses to  
970 Cell-Cycle Defects. *Dev. Cell* **40**, 405-420.e2 (2017).
- 971 76. Tajima, K. *et al.* SETD1A protects from senescence through regulation of the  
972 mitotic gene expression program. *Nat. Commun.* **10**, 2854 (2019).
- 973 77. Bunz, F. *et al.* Requirement for p53 and p21 to sustain G2 arrest after DNA  
974 damage. *Science (80- )*. (1998). doi:10.1126/science.282.5393.1497
- 975 78. Orlando, G., Khoronenkova, S. V, Dianova, I. I., Parsons, J. L. & Dianov, G. L.

- 976 ARF induction in response to DNA strand breaks is regulated by PARP1.  
977 *Nucleic Acids Res.* **42**, 2320–2329 (2014).
- 978 79. Halder, S. *et al.* SPRTN protease and checkpoint kinase 1 cross-activation  
979 loop safeguards DNA replication. *Nat. Commun.* **10**, 3142 (2019).
- 980 80. Bushell, S. R. *et al.* The structural basis of lipid scrambling and inactivation in  
981 the endoplasmic reticulum scramblase TMEM16K. *Nat. Commun.* **10**, 3956  
982 (2019).
- 983 81. Carpenter, A. E. *et al.* CellProfiler: image analysis software for identifying and  
984 quantifying cell phenotypes. *Genome Biol.* **7**, R100 (2006).
- 985 82. Burdova, K. *et al.* E2F1 proteolysis via SCF-cyclin F underlies synthetic  
986 lethality between cyclin F loss and Chk1 inhibition. *EMBO J.* e101443 (2019).  
987 doi:10.15252/embj.2018101443
- 988

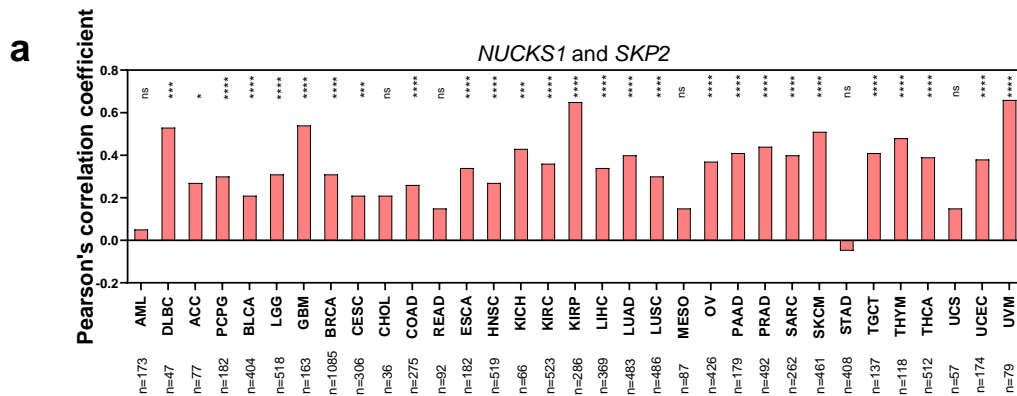

**b** *SKP2* locus - Chromosome 5: 36,151,989-36,196,849 (GRCh38)

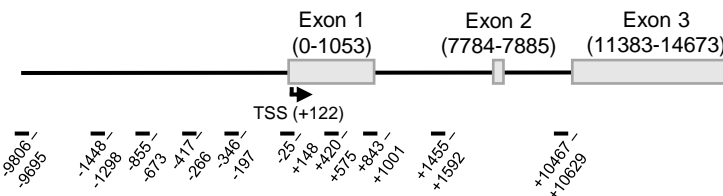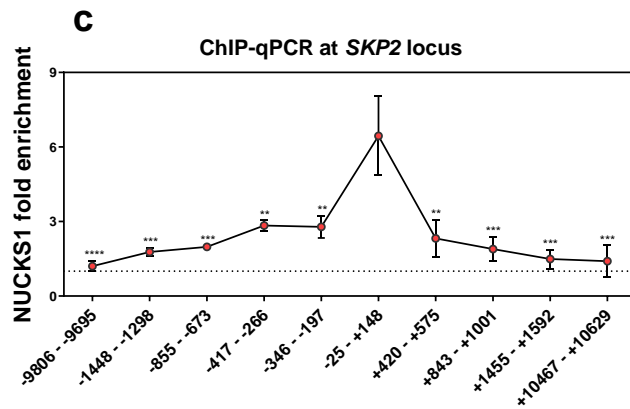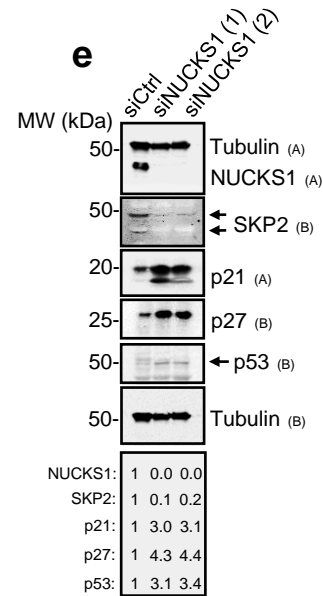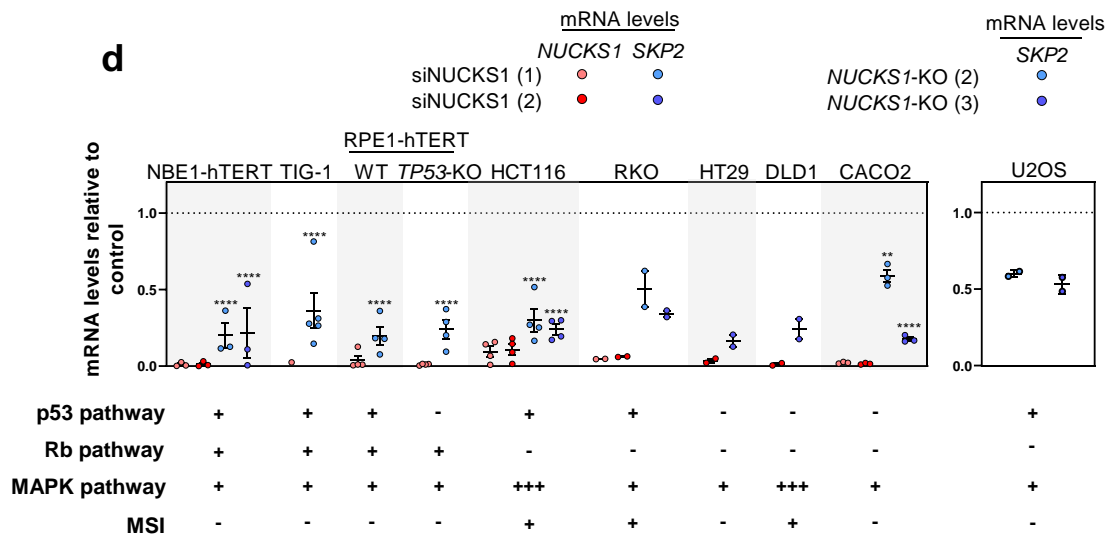

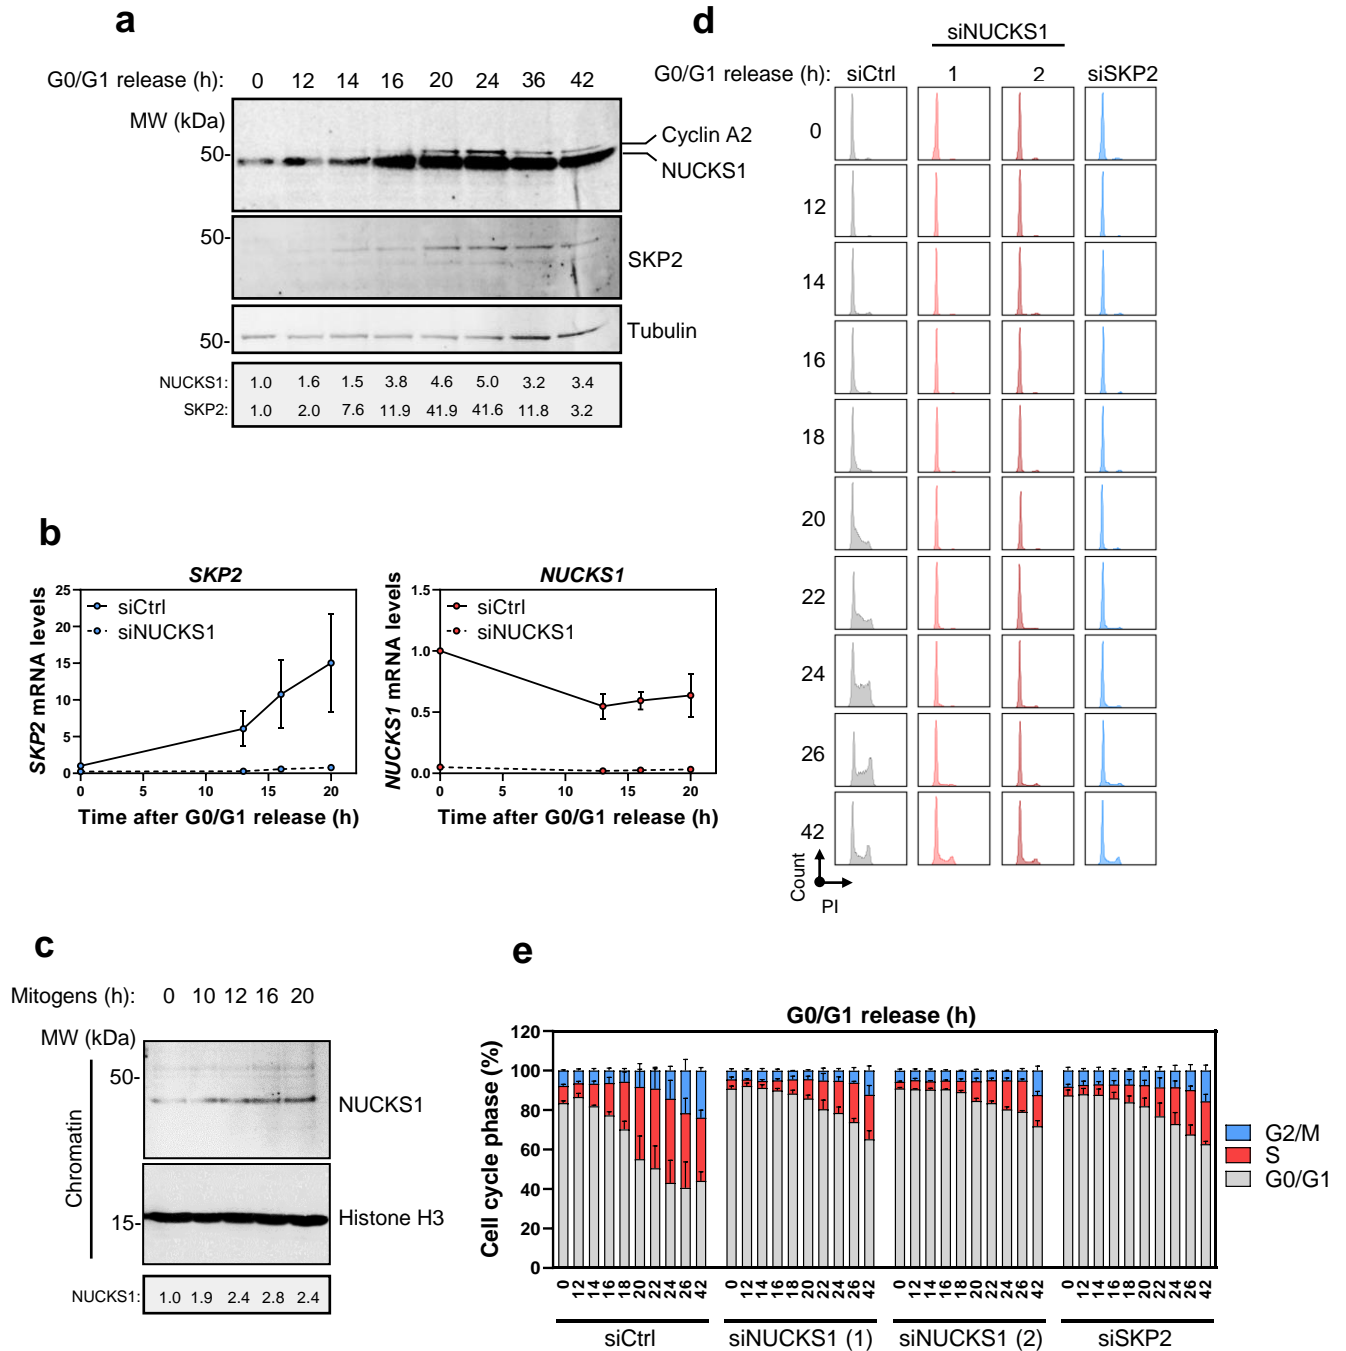

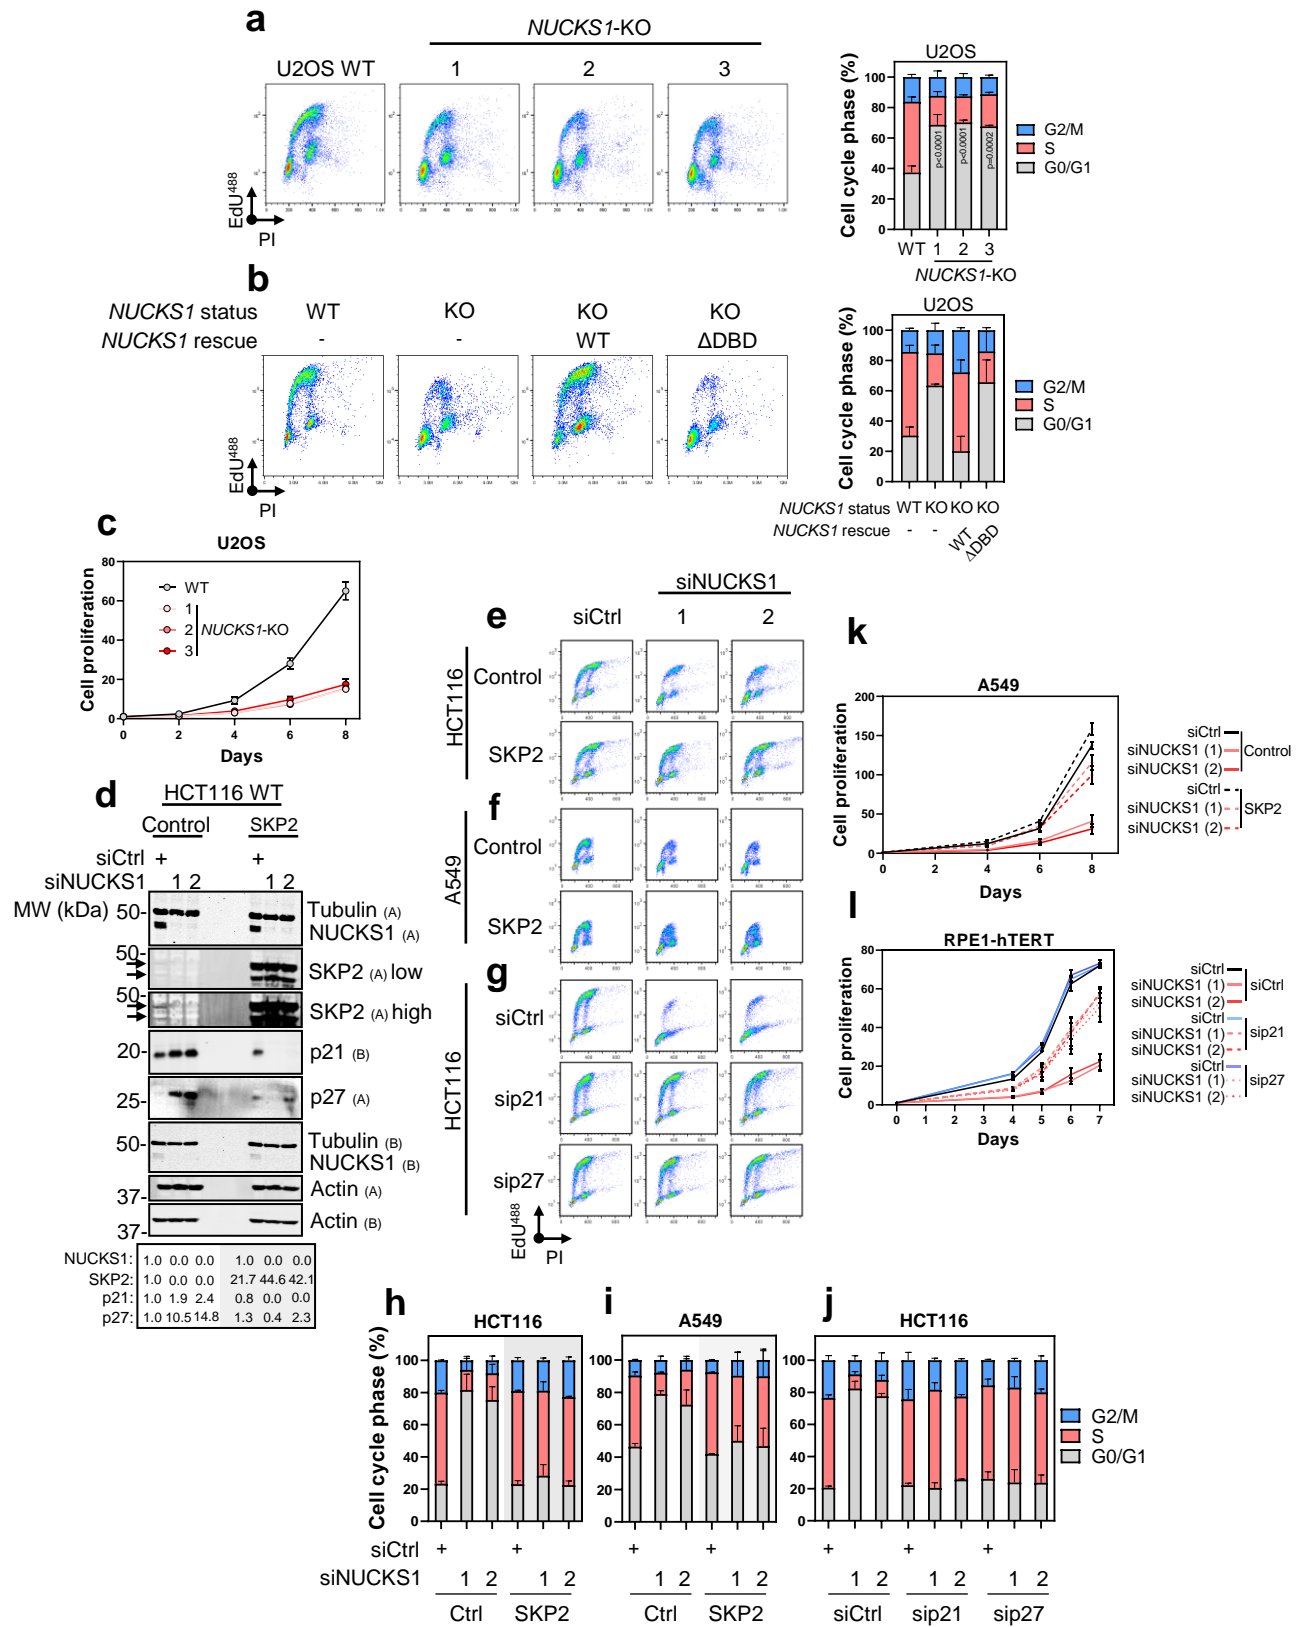



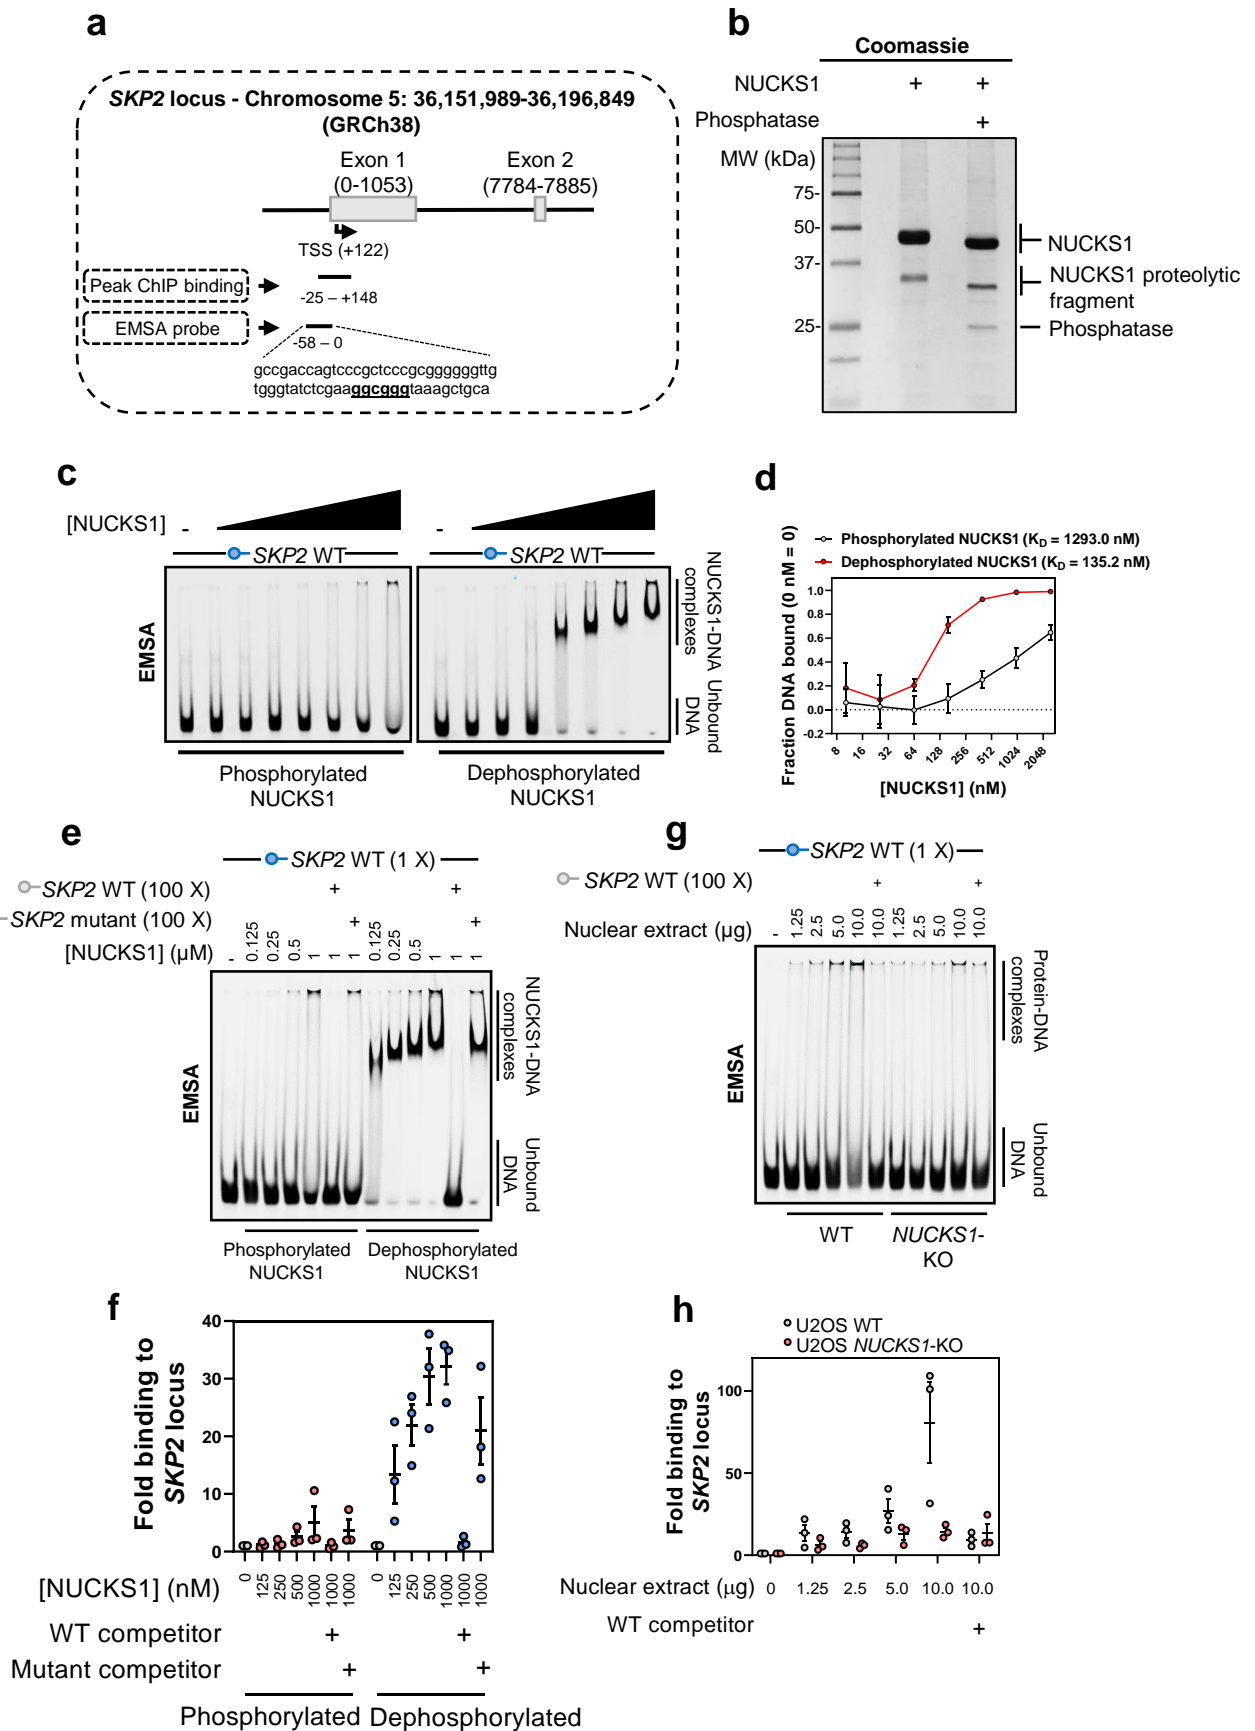



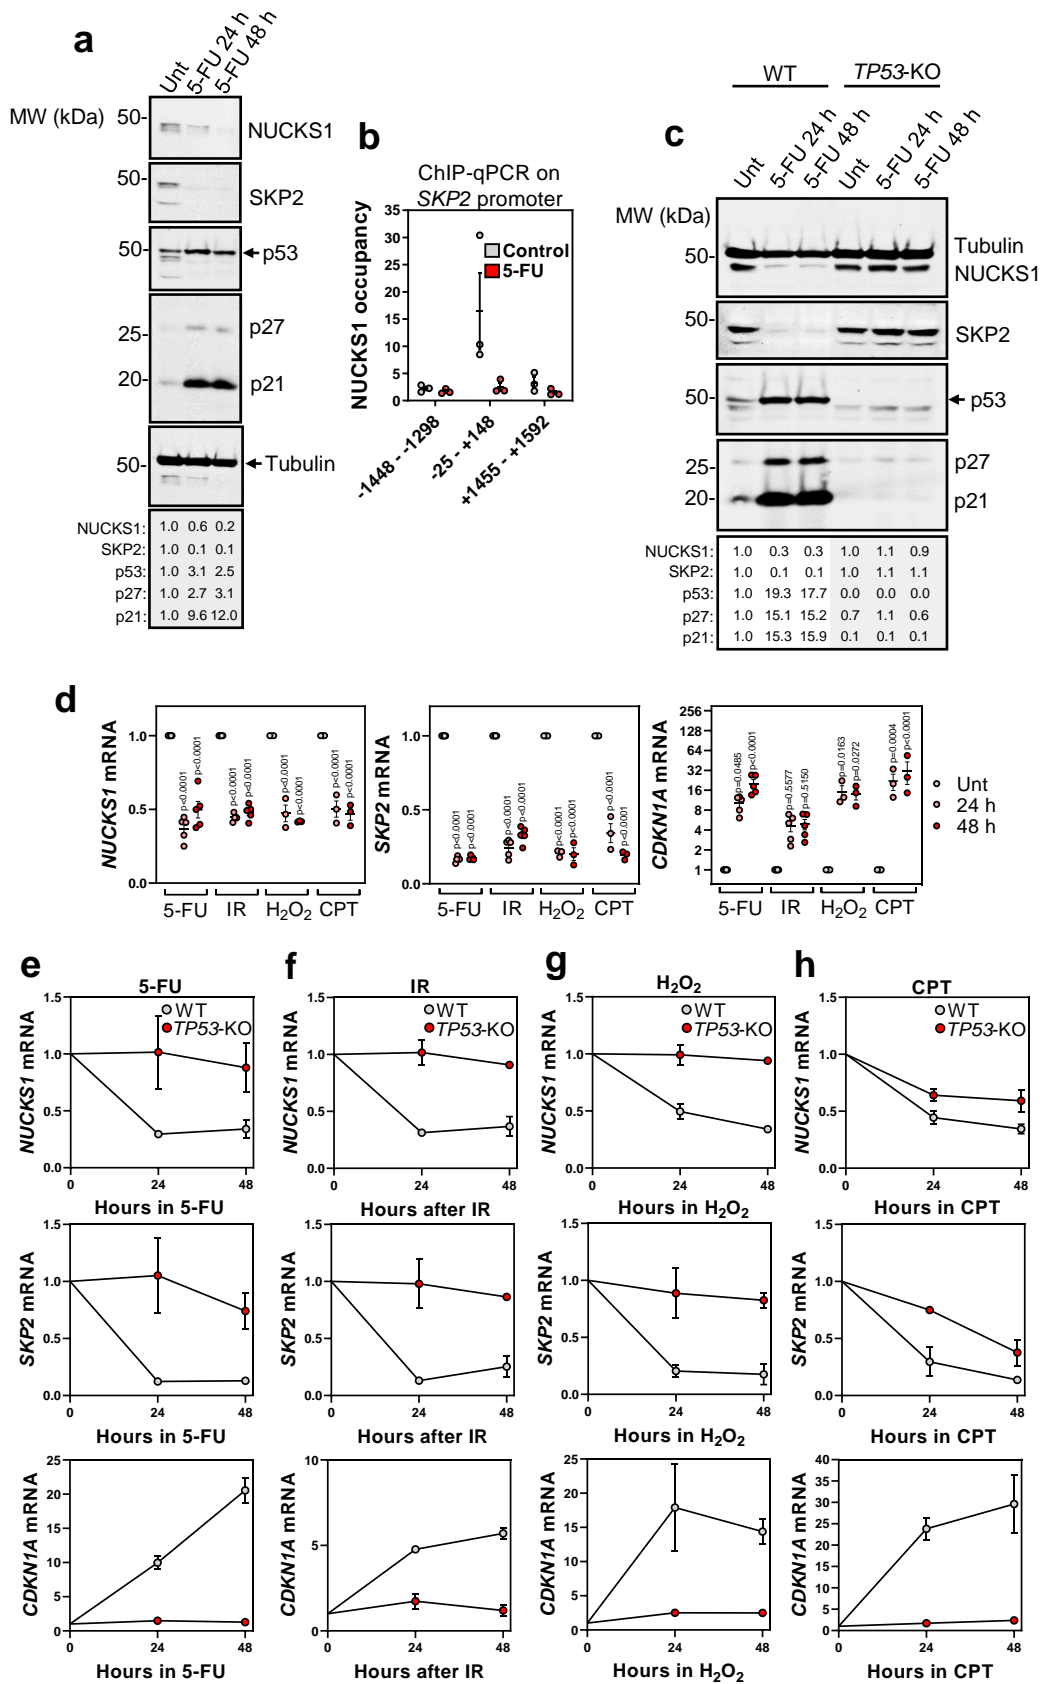

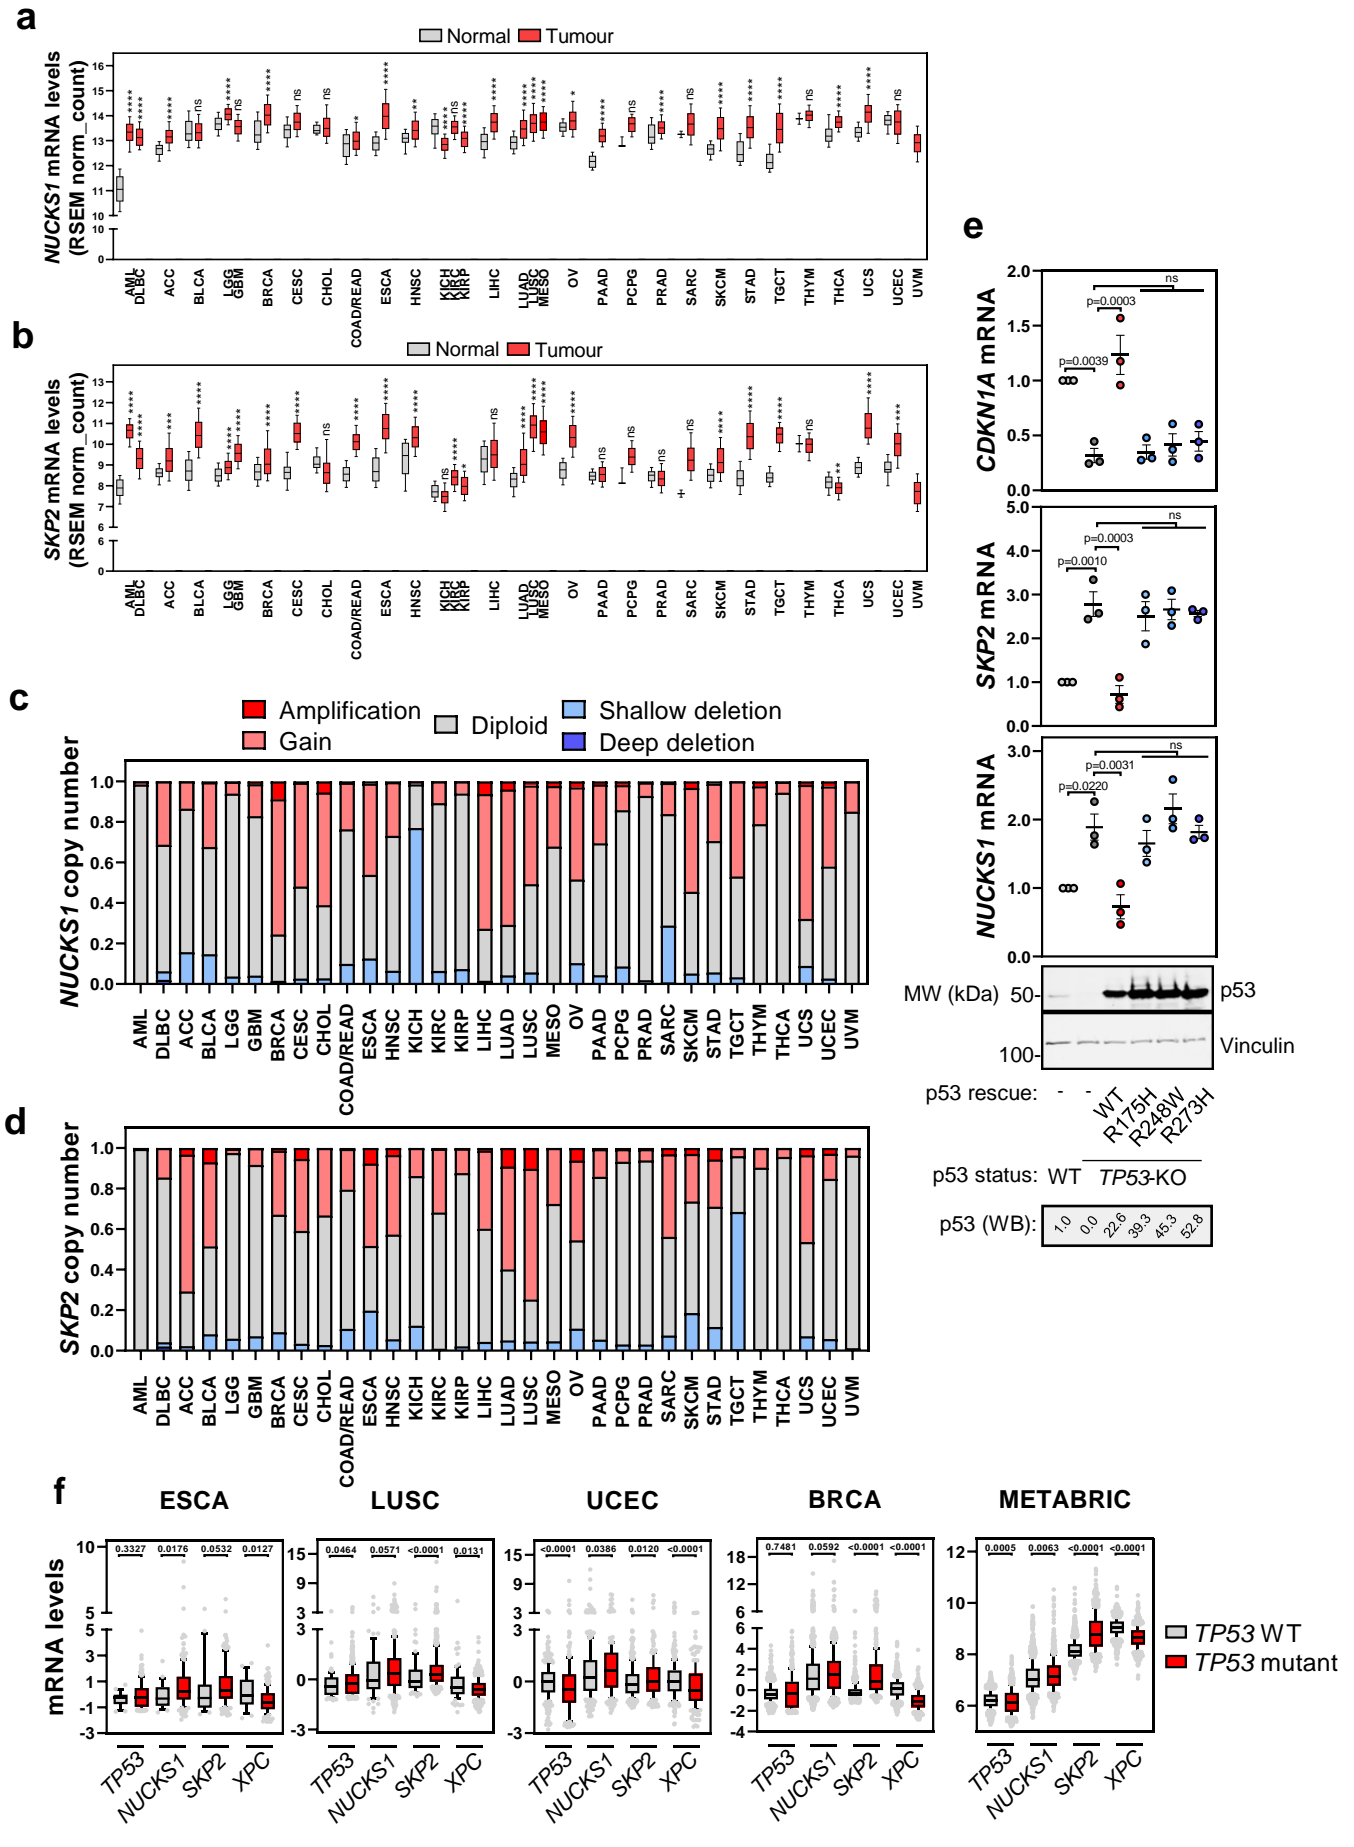

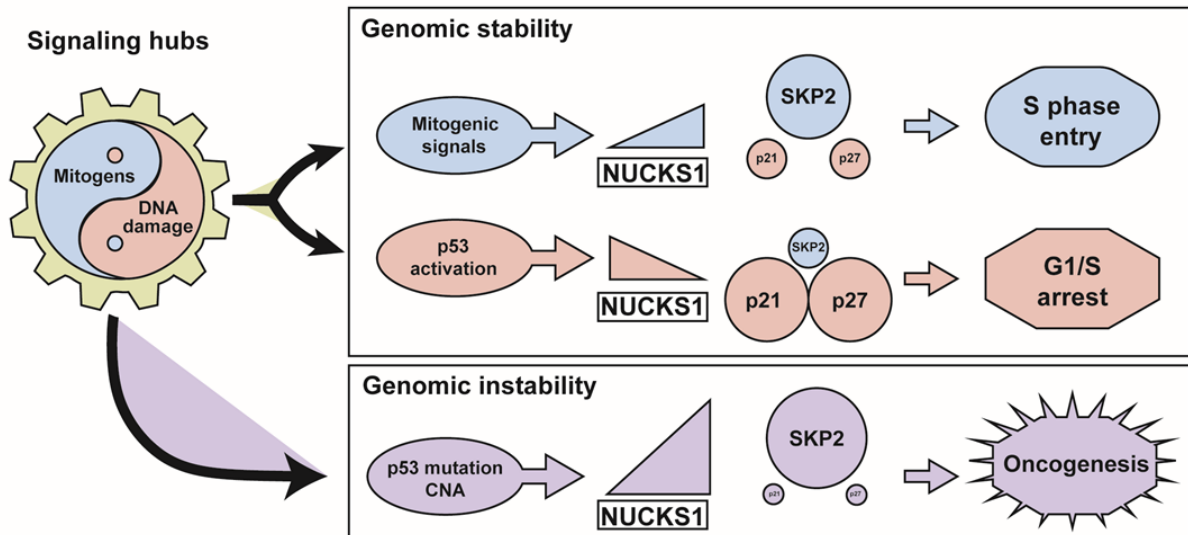

Source: https://www.biorxiv.org/content/10.1101/2021.06.29.450420v3.full.pdf
